# 1 Generation and attenuation of 2 variability in a bacterial signaling 3 network revealed by single-cell FRET

4 J.M. Keestra<sup>1</sup>, K. Kamino<sup>1</sup>, F. Anquez<sup>§1</sup>, M.D. Lazova<sup>1</sup>, T. Emonet<sup>2</sup>, T.S. Shimizu<sup>1</sup>

\*For correspondence:

[t.shimizu@amolf.nl](mailto:t.shimizu@amolf.nl) (TSS)

Present address: <sup>§</sup>University of  
Lille, France

5 <sup>1</sup>AMOLF Institute, Science Park 104, 1098XG Amsterdam, the Netherlands; <sup>2</sup>Department  
6 of Cellular and Molecular Biology, Yale University, New Haven, USA

---

8 **Abstract** We present *in vivo* single-cell FRET measurements in the *Escherichia coli* chemotaxis  
9 system that reveal the influence of network design on noise-induced variability, both across cells in  
10 isogenic populations and within individual cells over time. We find pervasive cell-to-cell variability in  
11 ligand-response sensitivity, adaptation timescale, as well as the steady-state set point of network  
12 output, and analyze the role of network parameters and topology in shaping this diversity. In the  
13 absence of ligand stimulation or changes in gene expression, we observe temporal fluctuations in  
14 the intracellular signal attributable to stochastic activities of adaptation enzymes CheR and CheB,  
15 with unexpectedly large amplitudes (>2-fold previous estimates). Our results demonstrate how  
16 signaling networks can tune population diversity and temporal variability by either amplifying or  
17 suppressing molecular noise, arising not only in gene expression processes but also in stochastic  
18 protein-protein interactions.

---

19

## 20 Introduction

21 Cellular physiology is deeply shaped by molecular fluctuations, resulting in phenotypic variability  
22 that can be both detrimental and beneficial (*Rao et al., 2002*). One of the most important and well-  
23 studied sources of intracellular fluctuations is stochastic gene expression (*Elowitz et al., 2002; Eldar*  
24 *and Elowitz, 2010; Raj and Van Oudenaarden, 2008*), which can generate substantial cell-to-cell  
25 variability in protein levels within isogenic populations under invariant environmental conditions.  
26 Such heterogeneity in protein counts are readily measurable by fluorescent-protein reporters  
27 (*Elowitz et al., 2002; Ozbudak et al., 2002*), but mechanistically tracing the consequences of such  
28 molecular noise to the level of complex cellular phenotypes such as signaling and motility remains  
29 a significant challenge, in part due to the multitude of interactions between gene products, but  
30 also because each of those interactions can, in principle, become an additional source of noise.  
31 In this paper, we study how multiple sources of molecular noise, arising in both gene expression  
32 and protein-protein interactions, affect performance of the *E. coli* chemotaxis network, a canonical  
33 signaling pathway.

34 In bacteria, gene-expression noise tends to manifest itself as stable cell-to-cell differences in  
35 phenotypes that persist over the cell's generation time, because typical protein lifetimes are longer  
36 than the cell cycle (*Li et al., 2014*). The architecture of signaling networks can have a profound  
37 influence on their sensitivity to such noise-induced differences in protein levels, and it has been  
38 shown that the design of the *E. coli* chemotaxis network confers robustness of a number of signaling  
39 parameters, such as precision of adaptation, against variability in gene expression (*Barkai and*  
40 *Leibler, 1997; Kollmann et al., 2005*). On the other hand, cell-to-cell differences in behavior can also  
41 be advantageous for isogenic populations under uncertain and/or time-varying environments, and  
42 it has been argued that the manner in which the chemotaxis network filters gene expression noise  
43 to shape phenotype distributions could be under selective pressure (*Frankel et al., 2014; Waite*  
44 *et al., 2016*).

45 In principle, molecular noise arising in processes other than gene expression, such as protein-  
46 protein interactions within signaling pathways, can also contribute to cellular variability. How-  
47 ever, such noise sources tend to be harder to study experimentally because, in contrast to gene-  
48 expression noise, which can be characterized by measuring fluorescent reporter levels (*Elowitz*  
49 *et al., 2002; Raser and O'Shea, 2004*), requirements for *in vivo* measurements of protein-protein  
50 interactions tend to be more demanding and no generically applicable strategies exist. The *E. coli*  
51 chemotaxis system provides a compelling experimental paradigm for addressing protein-signaling  
52 noise, because a powerful technique for *in vivo* measurements of protein signaling, based on  
53 Förster resonance energy transfer (FRET), has been successfully developed (*Sourjik and Berg,*  
54 *2002b; Sourjik et al., 2007*).

55 The chemotaxis network controls the motile behavior of *E. coli*, a run-and-tumble random

56 walk that is biased by the signaling network to achieve net migrations toward favorable directions.  
57 The molecular mechanisms underlying this pathway have been studied extensively (for recent  
58 reviews, see refs. *Wadhams and Armitage (2004); Tu (2013); Parkinson et al. (2015)*). In brief,  
59 transmembrane chemoreceptors bind to ligand molecules, inhibiting the autophosphorylation of a  
60 central kinase, CheA. When active, CheA transfers its phosphate to CheY to form CheY-P. Meanwhile,  
61 the phosphatase CheZ degrades CheY-P to limit the signal lifetime. CheY-P binds to a flagellar  
62 motor, which in turn increases the chance of the motor to turn clockwise, leading to a tumble.  
63 An adaptation module consisting of the enzymes CheR and CheB implements negative integral  
64 feedback by tuning the sensitivity of the chemoreceptors via reversible covalent modifications that  
65 restore the kinase activity (and CheY-P level).

66 Despite its relative simplicity, this pathway exhibits many interesting network-level functionalities,  
67 such as cooperative signal amplification (*Segall et al., 1986; Sourjik and Berg, 2002b; Bray et al.,*  
68 *1998*), sensory adaptation (*Barkai and Leibler, 1997; Alon et al., 1999*) and fold-change detection  
69 (*Mesibov et al., 1973; Lazova et al., 2011*), and FRET microscopy has proven extremely powerful in  
70 characterizing such signal processing of the chemotaxis pathway, especially in *E. coli* (*Sourjik and*  
71 *Berg, 2002b, 2004; Shimizu et al., 2010; Oleksiuk et al., 2011*), but also in *Salmonella* (*Lazova et al.,*  
72 *2012*) and *B. subtilis* (*Yang et al., 2015*). It has been implemented in various ways (*Sourjik and Berg,*  
73 *2002b,a; Shimizu et al., 2006; Kentner and Sourjik, 2009*), but most commonly by using CFP and YFP  
74 as the FRET donor-acceptor pair, fused to CheY and CheZ, respectively. To date, however, nearly all  
75 applications of FRET in the bacterial chemotaxis system have been population-level measurements  
76 in which signals from hundreds to thousands of cells are integrated to achieve a high signal-to-noise  
77 ratio. A pioneering study applied FRET at the single-cell level to study spatial heterogeneities in  
78 CheY-CheZ interactions (*Vaknin and Berg, 2004*), but those measurements were limited to relatively  
79 short times due to phototoxicity and bleaching.

80 By exploring a range of fluorescent proteins as FRET pairs, and improving measurement pro-  
81 tocols, we have developed a robust method for single-cell FRET measurements of chemotactic  
82 signaling dynamics in single bacteria over extended times. The data reveal extensive cell-to-cell  
83 variability, as well as temporal fluctuations that are masked in population-level FRET measure-  
84 ments. In contrast to previous single-cell experiments that relied on measurements of motor  
85 output or swimming behavior (*Berg and Brown, 1972; Spudich and Koshland, 1976; Segall et al.,*  
86 *1986; Korobkova et al., 2004; Park et al., 2010; Masson et al., 2012*), FRET alleviates the need to  
87 make indirect inferences about intracellular molecular interactions through the highly noisy 2-state  
88 switching of the flagellar motor, whose response function can vary over time due to adaptive  
89 remodeling (*Yuan et al., 2012*). In a typical experiment, we are able to obtain dozens of (up to  
90 ~100) single-cell FRET time series simultaneously, to efficiently collect statistics of phenotypic and  
91 temporal variability.

## 92 Results

### 93 Single-cell FRET reveals pervasive cell-to-cell variability in intracellular signaling

94 To measure variability in intracellular signaling, we adapted a FRET assay for chemotaxis widely  
95 used for population-level measurements with fluorescent fusions to CheY and its phosphatase  
96 CheZ (*Sourjik and Berg, 2002b*). On timescales longer than the relaxation of CheY's phosphoryla-  
97 tion/dephosphorylation cycle, the FRET level reflects the phosphorylation rate of CheY by the CheA  
98 kinase, thus providing an efficient *in vivo* measurement of the network activity (Fig. S1). Instead of  
99 the conventional CFP/YFP FRET pair we used the fluorophores YFP and mRFP1 to avoid excitation  
100 with blue light, which induces considerably stronger phototoxicity and also perturbs the chemotaxis  
101 system as a repellent stimulus (*Taylor and Koshland, 1975; Taylor et al., 1979; Wright et al., 2006*).  
102 A field of *E. coli* cells expressing this FRET pair were immobilized on a glass surface imaged in two  
103 fluorescence channels, and segmented offline to compute a FRET time series for each cell in the  
104 field of view (see [Materials and Methods](#)).

105 For wild-type cells (Fig. 1a) we found that the ensemble mean of single-cell FRET responses,  
106  $\langle \text{FRET} \rangle(t)$ , agrees well with previous population-level measurements (*Sourjik and Berg, 2002b*). Upon  
107 prolonged stimulation with a saturating dose of attractant  $\alpha$ -methylaspartate (MeAsp),  $\langle \text{FRET} \rangle(t)$   
108 rapidly fell to zero before gradually returning to the pre-stimulus level due to adaptation. Upon  
109 removal of attractant,  $\langle \text{FRET} \rangle(t)$  rapidly increased to a maximum before returning to the pre-stimulus  
110 baseline. Single-cell FRET time series,  $\text{FRET}_i(t)$ , had qualitatively similar profiles, but the kinetics  
111 of adaptation and response amplitudes demonstrate differences from cell to cell. For each cell,  
112  $\text{FRET}_i(t)$  is limited by the slow autophosphorylation of CheA and hence is proportional to  $a[\text{CheA}]_{T,i}$   
113 (provided  $[\text{CheY}]$  and  $[\text{CheZ}]$  are sufficiently high, see [Materials and Methods](#)), in which  $a$  is the  
114 activity per kinase and  $[\text{CheA}]_{T,i}$  the total amount of kinases part of the receptor-kinase complex.  
115 Hence from the  $\text{FRET}_i(t)$  the activity per kinase  $a$  can be readily determined by normalizing each  
116 FRET timeseries by its maximum response  $a = \text{FRET}_i / \text{FRET}_{i,\text{max}}$  (Figure 1b). The steady-state activity  
117  $a_{0,i}$  is then defined as the activity before the addition of attractant. The baseline activity per cell  
118 varies from cell-to-cell  $a_0$  (Fig. 1b,  $CV=0.22$ ). The network activity controls the flagellar motor  
119 rotation, and hence this is consistent with the observation that cells in isogenic population exhibit a  
120 variable steady-state tumble frequency (*Spudich and Koshland, 1976; Dufour et al., 2016*).

121 The adaptation precision is defined as its post-adaptational activity level ( $\Pi = a_{\text{adapted},i} / a_{0,i}$ ), hence  
122 a precision of 1 refers to perfect adaptation. The adaptation kinetics are quantified by the recovery  
123 time, the time required for each cell to recover to 50% of its post-adaptational activity level ( $a_{\text{adapted},i}$ ).  
124 When observing the distributions of these parameters we noted that the cell-to-cell variability  
125 (quantified by the coefficient of variation  $CV$ ), is high in the precision  $\Pi$  (Fig. 1d,  $CV=0.40$ ) but the  
126 average precision (0.79) agrees well with population measurements (*Neumann et al., 2014*). The  
127 variation is also substantial in  $\tau_{\text{recovery}}$  (Fig. 1d,  $CV=0.20$ ). This falls within the range of  $\sim 20$ -50%



128 from previous reports, in which single-cell recovery times were estimated from motor-rotation  
129 or swimming-behavior measurements (*Berg and Tedesco, 1975; Spudich and Koshland, 1976; Min  
130 et al., 2012*). The time required to recover from a saturating amount of attractant is determined not  
131 only by the stimulus size, but also the methylation rate of receptor modification sites catalyzed by  
132 CheR and the number of such sites that need to be methylated. Variability in the recovery time is  
133 thus likely to reflect cell-to-cell variability in the ratio between the expression level of CheR and that  
134 of the chemoreceptor species responding to ligand (Tar for the experiment in Fig. 1 a).

135 Thus, single-cell FRET allows efficient measurement of single-cell signaling dynamics that, on  
136 average, agree well with previous population-level FRET experiments and single-cell flagellar-based  
137 experiments, thereby revealing variability in a wide variety of signaling parameters.

### 138 **Diversity in the ligand response is modulated during population growth**

139 The chemotactic response of *E. coli* to chemoeffectors is known to be highly sensitive, with receptor-  
140 occupancy changes of less than 1% eliciting detectable responses both at the level of flagellar  
141 motor rotation (*Segall et al., 1986*) and the intracellular signal (*Sourjik and Berg, 2002b*). Naively,  
142 one might expect variability to be detrimental for sensory performance, and conversely that a  
143 highly sensitive system would imply less variability. Indeed, at the population level, the greatest  
144 apparent gain in the response (defined as the fractional change in output divided by fractional  
145 change in input) is observed in adaptation-deficient (CheRB-) cells, in which the receptor population  
146 is homogeneous with respect to their adaptational modification state.

147 We probed the ligand sensitivity of CheRB- cells (TSS58) at the single-cell level by FRET dose-  
148 response measurements in which step stimuli of successively larger amplitudes were applied over  
149 time (Fig. 2). Considerable variability in the response to the attractant L-serine were observed  
150 across the population of immobilized cells simultaneously experiencing the same stimulus, with  
151 response magnitudes often ranging from virtually zero to full response (Fig. 2a). The resulting  
152 dose-response data were analyzed by fitting each individual cell's FRET response by a Hill curve  
153 of the form  $[1 + ([L]/K)^H]^{-1}$ , where the parameters  $K$  and  $H$  are defined as the sensitivity and  
154 steepness, respectively, of the response. The family of dose response curves constructed from  
155 this ensemble of fit parameters reveals considerable variability from cell to cell in the shape of the  
156 response curve (Fig. 2b).

157 What could be the cause of the diversity in ligand response in the absence of adaptation-induced  
158 heterogeneity? We reasoned that expression-level variability of the five chemoreceptor species of  
159 *E. coli*, which are known to form mixed clusters with cooperative interactions (*Ames et al., 2002;  
160 Sourjik and Berg, 2004*), could endow isogenic populations with sensory diversity. In line with this  
161 idea, CheRB- cells expressing only a single chemoreceptor species (Tsr) demonstrated not only  
162 higher cooperativity, but also attenuated variability in the dose-response profile from cell to cell  
163 (Figure 2b-c), showing that the composition of the receptor population is important not only to

164 tune the average ligand response of a population, but also in generating a wide range of sensory  
165 phenotypes within an isogenic population.

166 It has been shown that expression level of chemoreceptors changes during growth of *E. coli* batch  
167 cultures: concomitant with the slowing of growth upon the transition from the exponential phase  
168 towards early stationary phase, the relative expression level ratio Tar/Tsr increases from majority  
169 Tsr ( $Tar/Tsr < 1$ ) to majority Tar ( $Tar/Tsr > 1$ ) (*Salman and Libchaber, 2007; Kalinin et al., 2010*). To  
170 probe the consequence of such changes for ligand-sensing diversity, we measured single-cell dose  
171 response curves in populations harvested at different cell densities during batch growth (Figure 2d).  
172 The resulting population-averaged responses show a dependence of dose-response parameters on  
173 the optical density (O.D.) of the culture, shifting from highly sensitive (low  $K$ ) and highly cooperative  
174 (high  $H$ ) at low cell densities ( $OD \approx 0.3$ ) to less sensitive (high  $K$ ) and less cooperative (low  $H$ ) at  
175 increased cell densities ( $OD \approx 0.45$ , and  $OD \approx 0.6$ ) (Fig. 2d, open triangles, and Fig. S6). This trend is  
176 also visible at the level of single cells, but we found the responses to be highly variable under each  
177 condition (Fig. 2d, filled points). Remarkably, both sensitivity  $K$  and cooperativity  $H$  varied by over  
178 an order of magnitude, far exceeding the uncertainty in parameter estimates due to experimental  
179 noise (Fig. S7).

180 To further test the idea that ligand-response diversity is governed by differences in receptor  
181 expression levels, we considered the pattern of covariation between the fitted sensitivity  $K$  and  
182 cooperativity  $H$  in single cells (Figure 2b, blue). In contrast to cells expressing Tsr as the only  
183 chemoreceptor, in which the variability in  $K$  is only 20 % (Figure 2b, orange), single cells expressing  
184 a wildtype complement of chemoreceptors demonstrated strong variation in  $K$ . This variation was  
185 negatively correlated with the cooperativity  $H$  (Figure 2d). Noting that this overall pattern of covari-  
186 ation agrees well with dose response parameters obtained from population-level FRET experiments  
187 in which the Tar/Tsr ratio was experimentally manipulated via plasmid-based expression control  
188 (Figure 2d, open triangles; data from *Sourjik and Berg (2004)*), we proceeded to quantitatively  
189 estimate the diversity in the Tar/Tsr ratio via fits of a multi-species MWC model (*Mello and Tu, 2005*;  
190 *Keymer et al., 2006*) to single-cell FRET data (see *Materials and Methods*). The resulting distribution  
191 of single-cell Tar/Tsr estimates (Figure 2e) was dominated by Tsr in cells harvested early ( $OD \approx 0.3$ )  
192 but the relative contribution of Tar increased in cells harvested at later stages of growth ( $OD \approx 0.45$   
193 and  $OD \approx 0.6$ ). Interestingly, in addition to this increase in the mean of the Tar/Tsr distribution  
194 during batch growth, which confirms previous reports that found increased Tar/Tsr ratios at the  
195 population level (*Salman and Libchaber, 2007; Kalinin et al., 2010*), we find that the breadth of  
196 the distribution also increases at later stages of growth. Thus, modulation of receptor expression  
197 during growth provides a means of tuning not only response sensitivity and cooperativity, but  
198 also single-cell diversity in the response of cell populations experiencing identical changes in their  
199 common environment.

200 The large variability in the Tar/Tsr ratio ( $CV \approx 0.5$  at O.D.=0.45) is somewhat surprising given that

201 the mean expression level of both receptors are known to be high and of order  $10^3$ - $10^4$  copies per  
202 cell (*Li and Hazelbauer, 2004*). At such high expression, intrinsic noise in expression levels (i.e. due  
203 to the production and degradation process of proteins, expected to scale as the square root of the  
204 mean) could be as low as a few percent of the mean, and gene-expression fluctuations are expected  
205 to be dominated by extrinsic noise components (i.e. those affecting regulation of gene expression,  
206 which do not scale with the mean). In *E. coli*, a global survey of gene expression noise established  
207 an empirical lower bound to extrinsic noise at  $CV \approx 0.3$  (*Taniguchi et al., 2010*), and measurements  
208 within the chemotaxis system also indicate that between a subset of chemotaxis genes, the extrinsic  
209 component of covariation does approach this limit (*Kollmann et al., 2005*). Interestingly, however,  
210 in a recent study (*Yoney and Salman, 2015*) found using single-cell flow-cytometry a high degree  
211 of variability in the ratio of Tar/Tsr promoter activities ( $CV \approx 0.45$  at O.D.=0.51) comparable to the  
212 range of ratios extracted from our analysis of dose response data. Given that cell-to-cell variability  
213 in the Tar/Tsr ratio is much greater than achievable lower bounds of gene-expression noise in  
214 bacteria, it would be interesting to investigate the mechanistic sources of this variability, such as  
215 operon organization, RBS strength, and promoter stochasticity (*Frankel et al., 2014*).

216 Variability in receptor expression could also explain the distribution of adaptation precision  
217 we observed in wildtype cells (Figure 1d). In a previous population-level study, it has been shown  
218 that adaptation precision depends strongly on the expression-level ratio between the multiple  
219 chemoreceptor species, with the highest adaptation precision being achieved when the ligand-  
220 binding receptor is a minority within the total receptor population (*Neumann et al., 2014*). Thus,  
221 the substantial heterogeneity in adaptation precision we observed ( $CV = 0.40$ ) upon a saturating  
222 MeAsp stimulus is consistent with strong variability in the Tar/Tsr ratio.

### 223 **CheB phosphorylation feedback attenuates cell-to-cell variability**

224 While bacteria can exploit molecular noise for beneficial diversification, variability can also limit  
225 reliable information transfer and degrade sensory performance. In the framework of *E. coli*'s run-  
226 and-tumble navigation strategy, chemotactic response to gradients requires that cells maintain a  
227 finite tumble bias (i.e. avoiding extreme values zero and one), to suppress unresponsive phenotypes  
228 that fail to switch between run and tumble states in response to the environmental inputs. One  
229 important mechanism that ensures responsiveness to stimuli over a broad range of input levels  
230 is sensory adaptation mediated by the methyltransferase/methylesterase pair CheR/CheB. These  
231 receptor-modifying enzymes provide negative feedback through the dependence of their catalytic  
232 activity on the receptor's signaling state: the rate of methylation (demethylation) by CheR (CheB)  
233 is a decreasing (increasing) function of receptor-kinase activity (*Borczuk et al., 1986; Amin and  
234 Hazelbauer, 2010*). This dependence of enzyme activity on the substrate conformation provides  
235 negative integral feedback that ensures precise adaptation (*Barkai and Leibler, 1997*) toward the  
236 pre-stimulus steady-state activity  $a_0$ .

237 Interestingly, one of the two adaptation enzymes, CheB, can be phosphorylated by CheA, the  
238 kinase whose activity it controls through its catalytic (demethylation) activity on receptors. Effectively,  
239 this adds an additional negative feedback loop to the network, but the role of this phosphorylation-  
240 dependent feedback has remained elusive since it has been shown to be dispensable for precise  
241 adaptation (*Alon et al., 1999*). Through theoretical analysis, it has been conjectured that this  
242 secondary feedback loop might play a role in attenuating effects of gene-expression noise (*Kollmann  
243 et al., 2005*), but experimental verification has been lacking. We therefore sought to investigate  
244 the influence of perturbations to this network topology on the variability of chemotactic signaling  
245 activity.

246 CheB consists of two domains connected by a flexible linker (Figure 3a). A regulatory domain,  
247 with structural similarity to CheY, can be phosphorylated at residue Asp<sup>56</sup> (*Djordevic et al., 1998*;  
248 *Stewart et al., 1990*). A catalytic domain mediates binding to specific residues on chemoreceptor  
249 cytoplasmic domains and removes a methyl group added by the counterbalancing activity of CheR.  
250 Phosphorylation induces a conformational change and activates CheB (CheB\*) (*Djordevic et al.,  
251 1998; Lupas and Stock, 1989*). Several mutants of CheB lack phosphorylation feedback while  
252 retaining catalytic activity. Here, we focus on two specific mutants: CheB<sup>D56E</sup>, which bears a point  
253 mutation at the phosphorylation site, and CheB<sub>c</sub>, which expresses only the catalytic domain of CheB  
254 (*Stewart et al., 1990; Alon et al., 1999*). Cells expressing these mutants have an altered network  
255 topology (Figure 3b) which lacks CheB phosphorylation feedback.

256 To study the influence of network topology on cell-to-cell variability, we expressed different forms  
257 of CheB (CheB<sup>WT</sup>, CheB<sup>D56E</sup>, CheB<sub>c</sub>) from an inducible promoter in a  $\Delta cheB$  strain and measured  
258 the response to a saturating amount of attractant (500  $\mu$ M MeAsp). The expression levels of  
259 each mutant are tuned such that they approximate the wild-type steady state activity level. The  
260 response of CheB<sup>WT</sup> was, as expected, very similar to cells in which CheB is expressed from its  
261 native chromosomal position (compare Figs. S9a and 1a). By contrast, cells expressing either of  
262 the two CheB mutants defective in phosphorylation demonstrated increased cell-to-cell variability  
263 in the steady-state activity compared to cells expressing CheB<sup>WT</sup>. The increased variability of  
264 the CheB phosphorylation-deficient mutants (CheB<sup>D56E</sup> and CheB<sub>c</sub>) was manifested not only in a  
265 higher coefficient of variation in  $a_0$  (1.07 and 1.10, respectively, and WT 0.7), but also a qualitatively  
266 different shape of the distribution of  $a_0$  across the population (Figure 3c). Whereas the distribution  
267 demonstrated a single peak in CheB<sup>WT</sup> cells with phosphorylation feedback, the distribution for the  
268 phosphorylation-feedback mutants demonstrated a bimodal shape with peaks close to the extreme  
269 values  $a_0 = \{0, 1\}$ .

270 We tested whether these strong differences in cell-to-cell variability might be the result of gene  
271 expression noise, by comparing expression-level distributions of the CheB mutants. We constructed  
272 fluorescent fusions of each *cheB* allele to the yellow fluorescent protein mVenus and quantified the  
273 distribution of single-cell fluorescence levels under the same induction conditions as in the FRET ex-

274 periments (figure S9). The ratio between the measured expression-levels (CheBc:WT:D56E $\approx$ 0.7:1:2.5)  
275 was compatible with expectations from the hierarchy of reported *in vitro* rates ( $k_b^{D56E} < k_b^{WT} < k_b^c$ )  
276 (Anand and Stock, 2002; Simms et al., 1985; Stewart, 1993), and expression-level variability, charac-  
277 terized by the coefficient of variation (CV), was very similar between the three strains (0.87, 0.90  
278 and 0.82). These findings suggest that the differences in cell-to-cell variability observed in FRET  
279 are not due to differences between the expression-level distributions of the three *cheB* alleles, but  
280 rather to the differences they impose on the signaling network topology.

281 What feature of the signaling network could generate such broad (and even bimodal) distri-  
282 butions of  $a_0$ ? It has been conjectured (Barkai and Leibler, 1997; Emonet and Cluzel, 2008) and  
283 demonstrated (Shimizu et al., 2010) that *in vivo* the enzymes CheR and CheB operate at or near  
284 saturation. An important consequence of enzyme saturation in such reversible modification cycles  
285 is that the steady-state activity of the substrate becomes highly sensitive to the expression level  
286 ratio of the two enzymes, a phenomenon known as zero-order ultrasensitivity (Goldbeter and  
287 Koshland (1981); see Materials and Methods). Within the chemotaxis system, saturation of both  
288 CheR and CheB can thus render the receptor modification level, and in turn, the CheA activity  $a_0$ ,  
289 ultrasensitive to the [CheR]/[CheB] concentration ratio. If we view this ultrasensitive mapping as a  
290 transfer function  $f$  between the ratio [CheR]/[CheB] and the steady-state activity  $a_0$ ,

$$a_0 = f([\text{CheR}]/[\text{CheB}])$$

then its characteristic steep sigmoidal profile can impose bimodality in the methylation level, and  
hence also in the activity of steady-state CheA activity,  $a_0$ , even at quite modest input variances  
for distributions of the ratio  $P_{RB}([\text{CheR}]/[\text{CheB}])$ . This is because the manner in which the transfer  
function  $f$  filters the [CheR]/[CheB] distribution,

$$P(a_0) = \frac{P_{RB}(f^{-1}(a_0))}{|f'(f^{-1}(a_0))|},$$

291 spreads the narrow range in the [CheR]/[CheB] distribution  $P_{RB}([\text{CheR}]/[\text{CheB}])$  over which  $f([\text{CheR}]/[\text{CheB}])$   
292 is steep across a broad range in  $a_0$ . Thus, even if expression-level noise for both CheR and CheB are  
293 modest, an ultrasensitive transfer function  $f$  can effectively amplify the variation in [CheR]/[CheB],  
294 and if the distribution of the latter ratio,  $P_{RB}([\text{CheR}]/[\text{CheB}])$  extends below and above the narrow  
295 region over which  $f$  is steep, the decreased slope of  $f$  (i.e. lower  $f'([\text{CheR}]/[\text{CheB}])$ ) in those  
296 flanking regions will tend to increase the weight on both sides of the broad  $P(a_0)$  distribution to  
297 produce a bimodal profile. On the other hand, if the steepness of  $f$  is reduced, the resulting  $P(a_0)$   
298 will have a reduced variance for the same input  $P_{RB}([\text{CheR}]/[\text{CheB}])$ .

299 Could the known biochemical differences between the three forms of CheB (CheB<sup>WT</sup>, CheB<sup>D56E</sup>,  
300 CheB<sub>c</sub>) explain the contrasting patterns of  $a_0$  variability observed in our single-cell FRET experiments?  
301 In the absence of any feedback, the steepness of  $f(\text{CheR}/\text{CheB})$  is solely determined by the low

302 Michaelis-Menten constants  $K_{B,R}$ , which corresponds to saturated kinetics of the enzymatic activity  
303 of CheRB and hence ultrasensitivity of the steady-state substrate activity. The expression ratio  
304 of CheR/CheB which determines the crossover point ( $a_0=0.5$ ) is set by the ratio of catalytic rates  
305 of CheR and CheB ( $k_{r,b}$ ). Hence the phosphorylation deficient mutants CheB<sup>D56E</sup> and CheB<sub>c</sub> both  
306 have steep curves but are shifted along the R/B axis due to very different catalytic rates. However, in  
307 the case of phosphorylation feedback, CheB<sup>WT</sup>, the same enzyme can be in two states, each  
308 with equal  $K_{r,b}$  but one low and one high  $k_r$ . Whether CheB is in the one state or the other is  
309 determined by the activity-dependent phosphorylation feedback. As a result, the curve of CheB<sup>D56E</sup>  
310 is activity dependent ( $f(a, CheR/CheB)$ ) and changes with activity by shifting between the two  
311 curves corresponding to the extremes of all phosphorylated or all unphosphorylated. Effectively,  
312 this makes the resulting curve  $f$  less steep. The mean of the distributions  $P_{RB}$  are tuned such  
313 to get the same mean activity level ( $\langle a_0 \rangle$ ), but the same variance in  $P_{RB}$  leads to very wide  $P(a_0)$   
314 distributions in absence of phosphorylation, while phosphorylation feedback ensures a much  
315 smaller, single-peaked distribution.

316 It has also been conjectured that the CheB phosphorylation feedback is responsible for the  
317 highly nonlinear kinetics of recovery from repellent (or attractant removal) responses *Shimizu et al.*  
318 (2010). Indeed, in cells expressing CheB<sub>c</sub>, the kinetics of recovery from the response to removal of  
319 500  $\mu$  MeAsp after adaptation appeared qualitatively different from that in cells expressing wildtype  
320 CheB, lacking the characteristic rapid recovery and instead appearing more symmetric with the  
321 CheR-mediated recovery upon addition of a saturating dose of attractant (Fig. S10). By contrast,  
322 CheB<sup>D56E</sup> was found to still possess a fast component, despite being defective in phosphorylation,  
323 albeit also with somewhat slower kinetics than wt. In summary, the clearest difference between  
324 wildtype and phosphorylation-defective CheB mutants is found in the variability of the steady-state  
325 signal output (i.e. kinase activity).

326 The bimodal distribution in kinase activity we observed in the phosphorylation-deficient CheB  
327 mutants implies that a large fraction of cells have a CheY-P concentration far below or far above  
328 the motor's response threshold and hence will impair chemotactic responses to environmental  
329 gradients. Consistent with this idea, in motility-plate experiments (Supplementary Figure S11) we  
330 found that chemotactic migration on soft-agar plates was severely compromised for both CheB<sup>D56E</sup>  
331 and CheB<sub>c</sub> compared to CheB<sub>WT</sub>, indicating that the phosphorylation feedback is important for  
332 efficient collective motility.

### 333 **Protein-signaling noise generates large temporal fluctuations in network output**

334 The slow kinetics of the adaptation enzymes CheR and CheB have been hypothesized to play a  
335 role not only in determining the steady-state kinase activity  $a_0$ , but also in generating temporal  
336 fluctuations of the intracellular signal (*Korobkova et al., 2004; Emonet and Cluzel, 2008; Park et al.,*  
337 *2010; Celani and Vergassola, 2012*). We found substantial differences between wildtype (CheRB+)

338 and adaptation-deficient (CheRB-) cells in the variability of their FRET signals across time (Fig. 4).  
339 The effect is clearly visible upon comparing long (~1h) FRET time series obtained from cells of these  
340 two genotypes (Figure 4a). The FRET signal in wildtype cells demonstrated transient excursions  
341 from the mean level that were far greater in amplitude than those in CheRB- cells. This amplitude  
342  $\eta \equiv \sigma_a / \langle a \rangle$  was quantified by computing the variance of each single-cell time series, low-pass filtered  
343 with a moving average filter of 10s, and shows that the fluctuation amplitudes are much larger in  
344 wildtype cells ( $\langle \eta \rangle = 0.44$ ) compared to adaptation-deficient cells ( $\langle \eta \rangle = 0.09$ ). Importantly, these  
345 experiments were carried out under conditions in which no protein synthesis can occur due to  
346 auxotrophic limitation (see **Materials and Methods**), thus ruling out gene-expression processes as  
347 the source of these fluctuations.

348 Power spectral density (PSD) estimates computed from such time series confirm a nearly  
349 flat noise spectrum for CheRB- cells, whereas CheRB+ cells demonstrated elevated noise at low  
350 frequencies (Fig. 4c). The amplitude of these low-frequency noise components do clearly vary from  
351 cell to cell, as can be gleaned in the diversity of single-cell power spectra. To quantify this protein-  
352 level noise due to CheR/CheB activity, we describe the fluctuating signal as an Ornstein-Uhlenbeck  
353 (O-U) process, with relaxation timescale  $\tau$  and diffusion constant  $c$ , which can be interpreted as  
354 a linear-noise approximation (*Van Kampen, 1981*) to the full stochastic chemical kinetics of the  
355 network controlling the mean kinase activity  $a$  (*Emonet and Cluzel, 2008*):

$$\frac{da}{dt} = -\frac{1}{\tau}a(t) + \sqrt{c}\Gamma(t) \quad (1)$$

356 where  $\Gamma(t)$  is a white noise process. The parameters  $\tau$  and  $c$  for each cell are readily extracted via  
357 the power-spectrum solution of the O-U process:

$$S_a(\omega) = \frac{2c\tau^2}{1 + (2\pi\omega\tau)^2} + E \quad (2)$$

358 where we have added to the standard Lorentzian solution (*Gillespie, 1996*) a white-noise term  $E$   
359 that may vary from cell to cell to account for experimental shot noise in the photon-limited FRET  
360 signal. Single-cell PSD data were well fit by Eq. 2 (Figure 2d), and the average of extracted single-cell  
361 fluctuation timescales ( $\langle \tau \rangle = 12.6$ s) (Figure 2e) are in good agreement with previously reported  
362 correlation times of flagellar motor switching (*Park et al., 2010; Korobkova et al., 2004*), as well as  
363 the kinetics of CheRB-mediated changes in receptor modification from *in vivo* measurements using  
364 radioactively labeled methyl groups (*Lupas and Stock, 1989; Terwilliger et al., 1986*). The noise  
365 amplitudes obtained from the fits of the PSD,  $\sigma_a = \sqrt{c\tau/2}$  yielded very similar noise amplitudes  
366 as calculated from the time series ( $\langle \eta_{OU} \rangle = 0.46$ , see Fig. S5). Interestingly, these noise levels  
367 are larger than expected. Previous studies had predicted a value of ~ 10 – 20%, based either on  
368 reported fluctuation amplitudes of motor switching (*Korobkova et al., 2004; Tu and Grinstein, 2005*)  
369 or biochemical parameters of the intracellular signaling network (*Emonet and Cluzel, 2008; Shimizu*



370 *et al., 2010*) and is also highly variable ( $\sigma_{\eta} = 0.24$ ) from cell to cell.

371 In summary, we confirmed the presence of strong temporal fluctuations in single-cell chemo-  
372 taxis signaling attributable to the stochastic kinetics of the adaptation enzymes CheR/CheB, and  
373 further found that the amplitude of these fluctuations vary considerably across cells in an isogenic  
374 population.

## 375 Discussion

376 The single-cell FRET measurements described here allowed us to quantify variability in a variety  
377 of signaling parameters of the bacterial chemotaxis system, both across cells in a population  
378 and within individual cells over time. By imaging many (up to  $\sim 100$ ) cells simultaneously, we are  
379 able to collect single-cell statistics at high throughput to build up single-cell statistics. Although  
380 single-cell experiments have a long history in studies of bacterial chemotaxis (*Berg and Brown,*  
381 *1972; Spudich and Koshland, 1976; Block et al., 1982; Korobkova et al., 2004; Dufour et al., 2016*),  
382 nearly all examples to date have relied on measurements of flagellar motor output (in either  
383 tethered or swimming cells). A major advantage of the FRET approach is that it provides a direct  
384 measurement of intracellular signaling that bypasses the noisy behavior of the flagellar motor (a  
385 stochastic two-state switch), thereby enabling accurate and efficient determination of signaling  
386 parameters.

## 387 From gene-expression noise to network-level diversity

388 A key feature of bacterial chemotaxis as an experimental system is that one can study *in vivo*  
389 signaling and behavior in a manner that is decoupled from gene expression and growth. Being an  
390 entirely protein-based signaling network, chemotaxis signaling responses do not require changes in  
391 gene expression, and the relatively short timescales of signaling reactions (subsecond to minutes)  
392 are well separated from those of changes in protein counts due to gene expression noise (minutes  
393 to hours). The ensemble of single-cell FRET time series measured in each of our experiments  
394 thus provide a snapshot of cell-to-cell variability due to stochastic gene expression in a variety of  
395 signaling parameters.

396 Our data revealed high variability in important signaling parameters connected to the adaptation  
397 system (Fig. 1). In the case of the variability in recovery times ( $CV=0.20$ ), this is likely due to variability  
398 in the CheR/receptor ratio from cell to cell. What consequences might such variability have on  
399 chemotactic behavior? A recent theoretical study has established that long (short) adaptation times  
400 are better suited for maximizing chemotactic migration rates in shallow (steep) gradients (*Frankel*  
401 *et al., 2014*). Thus, variability in adaptation times could partition the population into cells that will be  
402 more efficient in running up steep gradients, while others are specialists in climbing shallow ones.  
403 Interestingly, it was also found that optimal performance at each gradient involves tuning not only  
404 the adaptation time, but also other parameters such as swimming speed or tumble bias, leading

405 to a selective pressure not only for the distribution of individual parameters, but also correlations  
406 among them (*Frankel et al., 2014; Waite et al., 2016*). Whether such correlated variation exists  
407 among signaling parameters would be a fruitful avenue for future single-cell FRET studies.

408 In the ligand response of the network, we observed large cell-to-cell variability in the sensitivity  
409 ( $1/K$ ) and steepness ( $H$ ) of dose-response relations, for cells with a wildtype receptor population  
410 (Fig. 2). Using a mixed-species MWC model (*Mello and Tu, 2005*), we were able to estimate the Tar/Tsr  
411 ratio in single cells, which spans a broad range from nearly zero to more than two. This strong  
412 variability in the receptor-cluster composition has the potential to dramatically impact behavior.  
413 In their natural habitats, cells likely experience a variety of chemoeffector gradients simultaneously,  
414 each associated with an unknown fitness payoff for chemotactic pursuit. Generating diversity in the  
415 chemoreceptor ratio, which has been shown to determine which gradient to climb when challenged  
416 with such conflicting possibilities (*Kalinin et al., 2010*), could allow the isogenic population to hedge  
417 its bets to maximize net fitness gains. The Tar/Tsr ratio has also been shown to play an important  
418 role in setting the preferred temperature for thermotaxis (*Salman and Libchaber, 2007; Yoney and*  
419 *Salman, 2015*). Variability in Tar/Tsr would allow diversification of the preferred temperature across  
420 cells in the population, which will promote spreading of bacteria in environments with temperature  
421 gradients. Finally, when chemotactic bacteria colonize an initially nutrient-rich environment, they  
422 are known to successively exploit resources by emitting multiple traveling waves of chemotactic  
423 bacteria, each of which consumes and chases by chemotaxis a different nutrient component  
424 outward from the colony origin (*Adler, 1966*). Our observation that the population diversity in  
425 receptor ratios, and hence chemotactic preference, varies concomitantly with population growth  
426 could provide a means to tune the population fractions that engage in such excursions into virgin  
427 territory, and those that remain for subsequent exploitation of remaining resources. Thus, the  
428 diversity in ligand response and preference generated by variability in the Tar/Tsr ratio could have  
429 nontrivial consequences in a variety of behavioral contexts encountered by isogenic chemotactic  
430 (and thermotactic) populations.

### 431 **Suppression of gene expression noise by CheB phosphorylation feedback**

432 The role of phosphorylation feedback has been a long standing open question in the field of  
433 bacterial chemotaxis signaling, ever since its presumed role in providing precise adaptation was  
434 decisively ruled out by *Alon et al. (1999)*. In the ensuing years, a diverse set of hypotheses have  
435 been proposed to explain its purpose. Apart from precise adaptation, CheB phosphorylation has  
436 been suggested as possibly responsible for the non-linear response of CheB activity to changes in  
437 CheA kinase activity (*Shimizu et al., 2010; Clausznitzer et al., 2010*), ligand sensitivity of wild-type  
438 cells (*Barkai et al., 2001*), and as a possible mechanism to buffer gene-expression noise to suppress  
439 detrimental variability in the steady-state kinase activity. Here, we tested the latter hypothesis, by  
440 severing the phosphorylation feedback loop that has been implicated theoretically as a possible

441 noise-reduction mechanism (*Kollmann et al., 2005*). Our single-cell FRET data revealed that, not  
442 only does CheB phosphorylation feedback strongly attenuate the magnitude of variability in the  
443 steady-state kinase activity  $a_0$ , it also qualitatively changes the shape of the distribution  $P(a_0)$   
444 across cells to convert an otherwise bimodal distribution into a unimodal one (Fig 3d). The highly  
445 polarized bimodal distribution of steady-state activities in CheB phosphorylation mutants are likely  
446 detrimental, as they could drive  $a_0$  of a large fraction of the population too far from the flagellar  
447 motor's steep response threshold (*Cluzel et al., 2000; Yuan and Berg, 2013*) to effectively control  
448 swimming. The observation of a bimodal  $P(a_0)$  in the absence of phosphorylation feedback is  
449 consistent with a previous modeling study by *Emonet and Cluzel (2008)* in that the parameters of  
450 the CheR- and CheB-catalyzed covalent modification cycle appear to satisfy conditions for zero-order  
451 ultrasensitivity (*Goldbeter and Koshland, 1981*), which has been hypothesized to provide a source  
452 of slow and large amplitude temporal fluctuations with possible benefits for chemotaxis in certain  
453 environments (see below). The fact that CheB phosphorylation seems to strongly attenuate the  
454 steepness of the ultrasensitive relationship  $a_0 = f([R]/[B])$  between kinase activity and the  $[R]/[B]$   
455 ratio suggests that zero-order might not suffice to explain the large amplitude temporal fluctuations  
456 we observed in wildtype cells (see below).

### 457 **Diversity in temporal noise: bet-hedging across exploration and exploitation strate-** 458 **gies**

459 In addition to cell-to-cell variability in signaling parameters, single-cell FRET allowed us to resolve  
460 temporal fluctuations in signaling about the steady-state output within individual cells. In wild-type  
461 cells, we found that the steady-state activity fluctuates slowly (Fig. 4, correlation time  $\tau \approx 10s$ ) with  
462 a large amplitude ( $\eta = \sigma_a / \langle a \rangle \approx 40\%$ ), but this amplitude also varies significantly from cell to cell  
463 ( $CV \approx 0.6$ ). Fluctuations on this timescale were absent in CheRB- cells defective in receptor methy-  
464 lation/demethylation, indicating that these fluctuations are generated by stochastic processes in  
465 the activity of the adaptation enzymes CheR and CheB. Whereas the fluctuation correlation time  
466  $\tau$  in our FRET experiments was in close agreement with those from previously reported flagellar  
467 motor switching experiments (*Korobkova et al., 2004; Park et al., 2010*), the fluctuation amplitude  
468  $\langle \eta \rangle \approx 40\%$  was surprisingly large. Theoretical analysis of the motor-based noise measurements (*Tu*  
469 *and Grinstein, 2005*) had predicted a more modest noise level of intracellular noise, at 10-20% of the  
470 mean. The discrepancy is likely due, at least in part, to the recently discovered adaptation at the level  
471 of the flagellar motor (*Yuan et al., 2012*), which must effectively act as a highpass filter that attenu-  
472 ates frequencies near or below a cutoff frequency determined by its own characteristic timescale  
473 for adaptation. The fluctuation amplitude  $\eta$  was also much greater than previous estimates from  
474 pathway-based models that considered zero-order ultrasensitivity in the enzymatic activities of  
475 CheR and CheB (*Emonet and Cluzel, 2008*) and receptor cooperativity (*Shimizu et al., 2010*) as  
476 possible sources of noise enhancement. A plausible explanation for the latter discrepancy is that

477 receptor cooperativity, which can amplify not only ligand signals but also fluctuations in receptor  
478 methylation levels (*Duke and Bray, 1999; Shimizu et al., 2003; Mello et al., 2004*), is actually much  
479 stronger at the single-cell level than estimated from previous population-level FRET measurements.  
480 The dose-response data for CheRB- cells presented in this study clearly demonstrate that single-cell  
481 dose-response curves tend to be steeper than those obtained from fits to the population average.  
482 Determining the distribution of dose-response parameters for adapting (CheRB+) cells is thus of  
483 great interest and represents a promising direction for future study.

484 The temporal noise we observed could have profound implications for *E. coli*'s random-walk  
485 motility strategy, because slow fluctuations in the intracellular signal can enhance the likelihood of  
486 long run events and stretch the tail of the run-length distribution to yield power-law-like switching-  
487 time distributions over a range of time scales (*Korobkova et al., 2004; Tu and Grinstein, 2005*).  
488 Such non-exponential statistics are known to yield superior foraging performance in environments  
489 where resource distribution is sparse (*Viswanathan et al., 1999*), and temporal fluctuations in  
490 run-tumble behavior has also been shown theoretically to enhance climbing of shallow gradients  
491 by generating runs that are long enough to integrate over the faint gradient a detectable difference  
492 in ligand input (*Flores et al., 2012; Sneddon and Emonet, 2012*). Hence, the noise generated by the  
493 adaptation system can be advantageous in resource-poor environments (*deserts*) in which efficient  
494 exploration of space for sparsely distributed sources (*oases*) is of utmost importance. By contrast,  
495 strong temporal noise clearly degrades response fidelity in rich environments where the gradient  
496 signal is strong enough for detection with short runs, and might also complicate coordination of  
497 cells in collective behaviors such as the aforementioned traveling-wave exploitation of nutrients.  
498 Our finding that the noise amplitude varies strongly from cell to cell thus suggests that isogenic  
499 populations might be hedging their bets by partitioning themselves between specialists for local  
500 exploitation of identified resource patches and those for long-range exploration in search for new  
501 ones.

## 502 **Concluding remarks**

503 We described a new single-cell FRET technique capable of resolving intracellular signaling dynamics  
504 in live bacteria over extended times. Our results highlight how a protein-based signaling network  
505 can either generate or attenuate variability, by amplifying or filtering molecular noise of different  
506 molecular origins. Gene expression noise is harnessed, on the one hand, to generate diversity in  
507 the ligand response of isogenic populations, or attenuated, on the other the hand, in the control of  
508 steady-state signal output. In addition, we showed that signaling noise generated at the level of  
509 interacting gene products, in the stochastic protein-protein interactions within the signaling network,  
510 can be amplified by the signaling network to generate strong temporal temporal fluctuations that  
511 can propagate to the level of swimming behavior.

## 512 Materials and Methods

### 513 Strains and Plasmids

514 All strains used are descendants of *E. coli* K-12 HCB33 (RP437). Growth conditions were kept uniform  
515 by transforming all strains with two plasmids. All strains and plasmids are shown in Tables 1 and 2.

516 The FRET acceptor-donor pair (CheY-mRFP and CheZ-YFP) is expressed in tandem from a IPTG  
517 inducible pTrc99A plasmid, pSJAB12 or pSJAB106, with respective induction levels of 100 and 50  
518  $\mu$ M IPTG. The differences between pSJAB12 and pSJAB106 are i) the presence of a noncoding  
519 spacer in pSJAB106 to modify the ribosome binding site of CheZ *Salis et al. (2009)*, such that CheZ  
520 is expressed approximately 3 fold less, and ii) a A206K mutation in YFP to enforce monomerity.  
521 We also used pVS52 (CheZ-YFP) and pVS149 (CheY-mRFP1) to express the fusions from separate  
522 plasmids with induction levels of 50  $\mu$ M IPTG and 0.01 % arabinose, respectively. We transformed  
523 the FRET plasmids in adaptation-proficient strain (VS104) to yield CheRB+ and adaptation- (VS149)  
524 to get CheRB-. For attachment with sticky flagella from pZR1 we used the equivalent strains in *fliC*  
525 background (VS115 and TSS58).

526 For the experiments with the CheB mutants, pSJAB12 was transformed into VS124 together with  
527 plasmids expressing CheB<sup>WT</sup>, CheB<sup>D56E</sup> and truncated mutant CheB<sub>c</sub> (plasmids pVS91, pVS97 and  
528 pVS112, respectively, with induction levels of 1.5E-4, 6E-4 and 3E-4 % arabinose.

| Abbreviation  | Strain | Source                           | Relevant Genotype                           | plasmid 1 | plasmid 2    |
|---------------|--------|----------------------------------|---------------------------------------------|-----------|--------------|
| WT / CheRB+   | VS115  | V. Sourjik                       | $\Delta$ YZ $\Delta$ FliC                   | pSJAB106  | pZR2         |
| WT / CheRB+   | VS104  | <i>Sourjik and Berg (2002b)</i>  | $\Delta$ CheYZ                              | pVS52     | pVS149       |
| WT / CheRB+   | VS104  |                                  | $\Delta$ CheYZ                              | pSJAB12   | pBAD33       |
| WT / CheRB+   | VS104  |                                  | $\Delta$ CheYZ                              | pSJAB106  | pBAD33       |
| CheRB-        | TSS58  | <i>this work</i>                 | $\Delta$ RBYZ $\Delta$ FliC                 | pSJAB106  | pZR2         |
| CheRB-        | VS149  | <i>Sourjik and Berg (2004)</i>   | $\Delta$ RBYZ                               | pVS52     | pVS149       |
| CheRB-        | VS149  |                                  | $\Delta$ CheRBYZ                            | pSJAB12   | pBAD33       |
| CheRB-        | VS149  |                                  | $\Delta$ CheRBYZ                            | pSJAB106  | pBAD33       |
| CheBc         | VS124  | <i>Clausnitzer et al. (2010)</i> | $\Delta$ CheBYZ                             | pSJAB12   | pVS112       |
| D56E          | VS124  |                                  | $\Delta$ CheBYZ                             | pSJAB12   | pVS97        |
| WT CheB       | VS124  |                                  | $\Delta$ CheBYZ                             | pSJAB12   | pVS91        |
| Tsr only      | UU2567 | <i>Kitanovic et al. (2015)</i>   | $\Delta$ CheRBYZ, $\Delta$ MCP <sup>a</sup> | pSJAB106  | pPA114 Tsr   |
| $\Delta$ CheB | UU2614 | J.S. Parkinson                   | CheB $\Delta$ (4-345)                       | pTrc99a   | pVS91,97,112 |

All strains are descendants of *E. coli* K-12 HCB33 (RP437). In all FRET experiments, strains carry two plasmids and have resistance for chloramphenicol and ampicillin.

**Table 1.** Strains used in this study.

<sup>a</sup>all five chemoreceptor genes *tar tsr tap trg aer* deleted

### 529 FRET Microscopy

530 Förster Resonance Energy Transfer [FRET] microscopy was performed as previously reported (*Sour-*  
531 *jijk et al., 2007; Vaknin and Berg, 2004*). Cells were grown to OD=0.45-0.5 in Tryptone Broth (TB)  
532 medium from a saturated overnight culture in TB, both with 100  $\mu$ g/mL ampicillin and 34  $\mu$ g/mL  
533 chloramphenicol and appropriate inducers in the day culture. For the FRET experiments we used

| Name       | Product                                  | System  | Ind   | Res | Source                            |
|------------|------------------------------------------|---------|-------|-----|-----------------------------------|
| pVS52      | CheZ-5G-YFP                              | pBAD33  | ara   | cam | <i>Sourjik and Berg (2002b)</i>   |
| pVS149     | CheY-5G-mRFP1                            | pTrc99a | IPTG  | amp | <i>Sourjik and Berg (2002b)</i>   |
| pSJAB12    | CheZ-5G-YFP / CheY-5G-mRFP1              | PTrc99a | IPTG  | amp | This work                         |
| pSJAB106   | CheZ-5G-YFP <sup>a</sup> / CheY-5G-mRFP1 | PTrc99a | IPTG  | amp | This work                         |
| pVS91      | CheB <sup>b</sup>                        | pTrc99a | ara   | cam | <i>Liberman et al. (2004)</i>     |
| pVS97      | CheB-D56E <sup>c</sup>                   | pBAD33  | ara   | cam | <i>Clausznitzer et al. (2010)</i> |
| pVS112     | CheBc <sup>d</sup>                       | pBAD33  | ara   | cam | V. Sourjik                        |
| pSJAB 122  | CheBc-GS4G-mVenus                        | pBAD33  | ara   | cam | This work                         |
| pSJAB 123  | CheB(D56E)-GS4G-mVenus                   | pBAD33  | ara   | cam | This work                         |
| pSJAB 124  | CheB-GS4G-mVenus                         | pBAD33  | ara   | cam | This work                         |
| pZR 1      | FliC* <sup>e</sup>                       | pKG116  | NaSal | cam | This work                         |
| pPA114 Tsr | Tsr                                      | pPA114  | NaSal | cam | <i>Ames et al. (2002)</i>         |

**Table 2.** Plasmids used in this study.

<sup>a</sup>Contains a A206K mutation to enforce monomerity.

<sup>b</sup>expresses WT CheB

<sup>c</sup>carries a point mutation D56E in CheB

<sup>d</sup>expresses only residues 147-349 of CheB, preceded by a start codon (Met)

<sup>e</sup>expresses sticky FliC element *Scharf et al. (1998)*

534 Motility Media (MotM) (*Shimizu et al., 2006*), in which cells do not grow and protein expression is  
 535 absent. Cells were washed in 50 mL MotM, and then stored 0.5-6 h before experiment. In the  
 536 dose-response curve experiments and the temporal fluctuation measurements, cells were stored  
 537 up to three hours at room temperature to allow for further red fluorescence maturation.

538 Cells were either attached by expressing sticky FliC elements from a plasmid, with Poly-L-Lysine  
 539 (Sigma), or anti FliC antibodies column purified and pre-absorbed to FliC- cells (JY26) from rabbit  
 540 blood serum (a gift from Howard Berg). We found FRET experiments with sticky FliC to have the  
 541 highest signal-to-noise ratio.

542 Fluorescent images of the cells were obtained with a magnification of 40-100x. For excitation of  
 543 YFP, we either used 514 nm laser excitation set to 30 mW for 2 ms or an LED system (CoolLED, UK)  
 544 with an approximate exposure time of 40 ms to approximate the same illumination intensity per  
 545 frame. The sample was illuminated stroboscopically with a frequency between 1 and 0.2 Hz. RPF  
 546 excitation was performed by 2ms exposure of 60 mW 568 nm laser or equivalent with LED.

547 Excitation light was sent through a 519 nm dichroic mirror (Semrock, USA). Epifluorescent  
 548 emission was led into an Optosplit (Cairn Research, UK) with a second dichroic mirror (Semrock,  
 549 USA) and two emission filters to project the RFP and YFP emission side by side on an EM-CCD  
 550 (Princeton Instruments, USA) with multiplication gain 100. All devices were controlled through  
 551 custom-written software.

## 552 **Image processing**

553 Images were loaded and analyzed by means of in-house written scripts in MATLAB and Python.  
554 Images were corrected for inhomogeneous illumination. Single cells were selected by image  
555 segmentation on the donor emission with appropriate filter steps to remove clusters of cells or  
556 cells improperly attached to the coverslip. At the position of each cell a rectangular ROI is defined in  
557 which all fluorescence intensity is integrated. For experiments in which the concentration of donor  
558 molecules may influence the FRET signal, the experiments on the CheB mutants, segmentation  
559 was done separately for each frame to determine the cell shape and then linking these segmented  
560 images with a tracking algorithm (*Crocker and Grien, 1996*), afterwards, fluorescence intensities  
561 are normalized for the cell size (mask surface area) in segmentation and cells with low intensities  
562 were excluded from the analysis. The ROI for the donor intensity were subsequently used to  
563 obtain the acceptor intensity per cell, both in photon-count per pixel. Fluorescence intensities were  
564 corrected for bleaching by fitting a linear, single exponential or double exponential function to the  
565 fluorescence decay, separately for both donor and acceptor. Cells in which the intensity decay  
566 cannot accurately be corrected were excluded from the analysis.

## 567 **FRET analysis**

568 The FRET signal is calculated from fluorescent time series. We observe changes in the ratio  $R = A/D$ ,  
569 in which A and D are the fluorescence intensities of the acceptor and donor. In previous population-  
570 averaged FRET experiments the FRET per donor molecule ( $\Delta D/D_0$ ) is calculated as (*Sourjik and*  
571 *Berg, 2002b; Sourjik et al., 2007*):

$$\frac{\Delta D}{D_0} = \frac{\Delta R}{\alpha + R_0 + \Delta R} \quad (3)$$

572 in which  $R_0$  is the ratio in absence of FRET,  $\alpha = |\Delta A/\Delta D|$  is a constant that depends on the exper-  
573 imental system (in our case  $\alpha = 0.30$ ) and the change in ratio as a result of energy transfer  $\Delta R$ .  
574  $\Delta R$  and  $R_0$  are obtained through observing the ratio just after adding and removing saturated  
575 attractant stimuli. This expression is convenient because it is invariant for inhomogeneous illumina-  
576 tion. However, in single-cell FRET this expression may generate additional variability in FRET due  
577 to variable donor levels from cell to cell. Hence it is more convenient to define the FRET levels in  
578 terms of the absolute change in donor level  $\Delta D$ , since this reflects the number of resonance energy  
579 transfer pairs

$$\text{FRET}(t) = \Delta D = D_0 \frac{\Delta R}{\alpha + R_0 + \Delta R} \quad (4)$$

580 Since FRET occurs only when CheY-P and CheZ interact, the FRET level is proportional to the  
581 concentration of complex [Yp-Z]. If we assume the CheY-P dephosphorylation by CheZ follows  
582 Michaelis-Menten kinetics we can describe the [Yp-Z] concentration in terms of the activity of the  
583 kinase CheA. For this, we assume the system is in steady-state for timescales much larger than  
584 CheY phosphorylation-dephosphorylation cycle ( $\approx 100$  ms). In that case, the destruction rate should



585 equal the rate of CheA phosphorylation and hence the FRET signal is proportional to the activity  
586 per kinase  $a$  and the amount of CheA in the kinase-receptor complex (*Sourjik and Berg, 2002b*;  
587 *Oleksiuk et al., 2011*):

$$\text{FRET} \propto [\text{Yp-Z}] = a \frac{k_A}{k_Z} [\text{CheA}] \approx a \frac{k_A}{k_Z} [\text{CheA}]_T \quad (5)$$

588 This last step is only valid if we further assume CheA autophosphorylation being the rate-limiting  
589 step. This is the case only if sufficient amounts of CheZ and CheY present in the cell. We have  
590 found that the FRET level initially increases with donor (CheZ) levels, but then saturates and remains  
591 constant for CheY and CheZ (see Fig. S8).

592 In many cases the most relevant parameter is the normalized FRET response. The FRET level  
593 reaches maximum if all kinases are active ( $a \approx 1$ ). In case of CheRB+ cells, this is the case when  
594 removing a saturating amount of attractant after adaptation (*Sourjik and Berg, 2002b*). For CheRB-  
595 cells the baseline activity is (*Sourjik and Berg, 2002b*; *Shimizu et al., 2010*) close to 1. Hence  
596 the normalized FRET  $\text{FRET}(t)/\text{FRET}_{\max}$  represents the activity per kinase  $a(t)$  and is the relevant  
597 parameter for many quantitative models for chemoreceptor activity (*Tu, 2013*).

$$a(t) = \frac{\text{FRET}(t)}{\text{FRET}_{\max}} \quad (6)$$

598 and from  $a(t)$  the steady-state activity  $a_0$  can be determined by averaging  $a(t)$  over baseline values  
599 before adding attractant stimuli.

## 600 Power Spectral Density Estimates

601 From FRET time series of length  $T$  and acquisition frequency  $f$  we calculated Power Spectral Density  
602 [PSD] estimates as

$$S_{\text{FRET}}(\omega) = \frac{1}{T} |\mathcal{F}(\omega)|^2 \quad (7)$$

603 in which  $\mathcal{F}(\omega)$  is the discrete-time Fourier transform. We only consider positive frequencies and  
604 multiply by two to conserve power.

605 To study the influence of experimental noise and the effect of estimating  $\tau$  and  $c$  from a finite  
606 time window, we generated O-U time series using the update formula (*Gillespie, 1996*)

$$X(t + \Delta t) = X(t) - \tau^{-1} \Delta t + c^{1/2} n(\Delta t)^{1/2} \quad (8)$$

607 in which  $n$  denotes a sample value from a normal variable. To the generated time series Gaussian  
608 white noise was added to simulate experimental noise. The experimental noise amplitude was  
609 obtained from the average power at high frequencies.

## 610 Dose Response Curve Analysis

611 Normalized FRET responses to different levels of ligand are fit to a hill curve of the form

$$a = \frac{[L]^H}{[L]^H + [K]^H} \quad (9)$$

This can be connected to an MWC model of receptor cluster activity Shimizu *Shimizu et al. (2010)* in the regime  $K_I \ll [L] \ll K_A$ , resulting in the correspondence key

$$H = N$$

$$K = K_I e^{f_m(m)}$$

612 which relates the Hill slope directly to the cluster size  $N$ , and sensitivity  $K$  to the methylation energy  
 613 of the receptor. We plot  $K$  on a logarithmic scale to scale linearly with energy.

614 To obtain expression level estimates of different receptor species we use a different MWC model.  
 615 Following *Mello and Tu (2005)*, we use as an expression for the normalized response of cells to  
 616 ligand  $[L]$  serine

$$a = \frac{\epsilon_0 \epsilon_S^{N_S} \epsilon_A^{N_A} (1 + C[L]/\tilde{K})^{N_S}}{(1 + [L]/\tilde{K})^{N_S} + \epsilon_0 \epsilon_S^{N_S} \epsilon_A^{N_A} (1 + C[L]/\tilde{K})^{N_S}} \quad (10)$$

617 in which  $N_A$  is the number of Tar receptors in the cluster and  $N_S$  is the number of Tsr receptors.  
 618 Parameters  $\epsilon_A$ ,  $\epsilon_S$ ,  $\epsilon_0$  are the energies corresponding to binding of ligand to Tar, Tsr and the other  
 619 three receptors and are the same for each cell, like  $C$  and  $\tilde{K}$  which describe the disassociation  
 620 constant for the active state as  $K_A = \tilde{K}/C$ , while  $N_A$  and  $N_T$  may vary from cell to cell. This yields  
 621 the minimization problem for all 128 cells

$$\min \sum_i^{N_{cells}} \sum_j^{N_{stim}} (m_{i,j} - a_{i,j})^2 \quad (11)$$

622 in which  $m_{i,j}$  the measured FRET response normalized to the response amplitude of cell  $i$  to stimulus  
 623  $L_j$ . This function was minimized using the matlab function `fmincon` (optimization toolbox). The  
 624 total number  $N_T = N_A + N_S$  is limited to 32. When fitting the model used the energy parameters  $\epsilon$   
 625 from reference *Mello and Tu (2005)* where used as initial guess with a maximum of  $\pm 5\%$  deviation.  
 626 This yielded an estimate of  $N_A$  and  $N_S$  for each cell. Under the assumption that receptor clusters  
 627 are well-mixed, this yields a Tar/Tsr ratio of  $N_A/N_S$ .

| Parameter    | Start Value <i>Mello and Tu (2007)</i> | Final Value        |
|--------------|----------------------------------------|--------------------|
| $C$          | 0.314                                  | 0.29               |
| $\epsilon_0$ | 0.80                                   | 0.84               |
| $\epsilon_A$ | 1.23                                   | 1.29               |
| $\epsilon_S$ | 1.54                                   | 1.61               |
| $\tilde{K}$  | -                                      | 21.2 $\mu\text{M}$ |

**Table 3.** List of global parameters used for model of Mello and Tu. In these fits,  $\tilde{K}$  is a free parameter while others are constrained  $\pm 5\%$  by published values.

628 **Ultrasensitive adaptation model of phoshorylation feedback**

We model the methylation-demethylation cycle of the receptors as a Goldbeter-Koshland cycle (*Goldbeter and Koshland, 1981; Emonet and Cluzel, 2008*). For simplicity, we do not explicitly describe the methylation and demethylation of the receptors explicitly but instead assume that CheR (R) activates the receptor-kinase complex directly ( $A^*$ ), and that CheB (B) deactivates it (A).

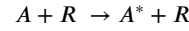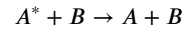

629 We now assume that these reactions follow Michaelis-Menten kinetics and the total amount of  
 630 kinase complexes is constant ( $A_T = A^* + A$ ). Hence the change in  $\mathcal{A} = A^*/A_T$  can be described as

$$\frac{d\mathcal{A}}{dt} = v_r \frac{1 - \mathcal{A}}{K_r + 1 - \mathcal{A}} - v_b \frac{\mathcal{A}}{\mathcal{A} + K_b} \quad (12)$$

631 in which  $v_r$  and  $v_b$  are the rates for the reactions mediated by R and B, respectively. The Michaelis-  
 632 Menten constants  $K_b$  and  $K_r$  are in units of  $A_T$  and are therefore dimensionless numbers. We are  
 633 interested in the steady-state level  $\mathcal{A}_0$  and its dependence on the kinetic parameters in equation 12.  
 634 This is described by the Goldbeter-Koshland function *Tyson et al. (2003)*, an exact solution to the  
 635 system in case [R] and [B] are much smaller than  $[A]_T$ .

$$\mathcal{A}_0[v_r, v_b, K_r, K_b] = \frac{2v_r K_r}{(v_b - v_r + v_b K_b + v_r K_r + \sqrt{(v_b - v_r + v_b K_b + v_r K_r)^2 - 4(v_b - v_r)v_r K_r}} \quad (13)$$

636 The shape of this curve is sigmoidal if the Michaelis-Menten constants  $K_r$  and  $K_b$  are much smaller  
 637 than one. For CheB phosphorylation, we assume the phosphorylation rate depends linearly on  
 638 active CheA and write

$$\frac{d[\text{Bp}]}{dt} = k_p[\text{B}]\mathcal{A}(v_r, v_b, K_b, K_r) - k_{dp}[\text{Bp}] \quad (14)$$

639 with the corresponding conservation law  $B_T = \text{B}_p + \text{B}$ . For the case for wild-type CheB, with phosphory-  
 640 lation feedback, the rates can be described in terms of catalytic rate times the enzyme (subspecies)  
 641 concentration

$$v_b = k_b([\text{B}_T] - [\text{Bp}]) + M k_b[\text{Bp}] \quad (15)$$

$$v_r = k_r[\text{R}]$$

in which  $M$  stands for the ratio of demethylation rates of unphosphorylated and phosphorylated CheB. The fraction of the phosphorylated CheB,  $[\text{Bp}]/[\text{B}]_T$ , which is given by  $k_{dp}/(k_p + k_{dp})$  then determines the effective activity of CheB. Equation 14 is solved numerically using Mathematica for [Bp] and the result is substituted in equation 13. In the absence of feedback, the activity can be

directly calculated from equation 13 with the rates being simply

$$v_b = k_b[B]$$

$$v_r = k_r[R]$$

642 We only need to consider the ratio of rate constants  $k_r$  and  $k_b$  which determines at which expression  
643 ratio  $[\text{CheR}]/[\text{CheB}]$  the activity equals 1/2. We assume  $k_r = k_b$  for simplicity, since the shape of the  
644 curve from Eq. 13 is not affected, it only shifts the the curve along the horizontal axis. Similarly, we  
645 only consider the ratio of phosphorylation and dephosphorylation rates. This leaves the system of  
646 equations above only has a few parameters:  $K_{b,r}$ ;  $M$ ; and the ratios  $k_r/b_b$  and  $k_p/k_{dp}$ ,  $M$ . In table 4,  
647 the parameters used for the calculations are listed.

648 We first fixed the phosphorylation rates  $k_p > 2k_{dp}$ . This means that the steady-state phospho-  
649 rylated level of CheB  $[B_p]/[B_T]$  at activity  $\approx 1/3$  is around 15 %. This parameter is not constrained  
650 by any direct observation, but it is clear the system benefits from a relatively low fraction of  
651 phosphorylation, to be able to up and down regulate the levels effectively upon changes in activity.

652 Generally, we assume D56E to behave like unphosphorylated CheB. The gain in catalytic rate of  
653 activated CheB is estimated to be nearly a 100 fold, but this does not agree with the expression  
654 level differences between the different CheB mutants so we made a conservative estimate of 15  
655 (the attenuating effect increases with the gain). CheBc behaves approximately like phosphorylated  
656 CheB (albeit with increase of only 7 compared to D56E), qualitatively consistent with measured  
657 *in vitro* rates for CheBc and phosphorylated intact CheB **Anand and Stock (2002)**. The difference  
658 between predicted rates and might be due to the fact that the rate experiments were performed  
659 *in vitro*. Michaelis Menten constants used in the model are lower than 1, but how low is not well  
660 constrained by data, and estimations do not take into account the possible attenuating effect of  
661 phosphorylation. Our experimental data on the distribution of  $a_0$  implies the sigmoidal curve is  
662 steep in the absence of phosphorylation and hence that  $K_b$  and  $K_r$  are quite small. The variability in  
663  $a_0$  for CheBc is lower than D56E, implying that the curve is less steep and hence we have chosen  
664 are  $K_r$ , which is not quite as low as D56E.

665 To simulate gene expression noise, we simulated  $[\text{CheR}]/[\text{CheB}]$  log-normal distributions with  $\sigma =$   
666 0.18 for all three strains. The mean of the distribution was chosen to yield an average steady-state  
667 network activity ( $a_0$ ) of 0.4. The resulting distribution of  $a_0$  was calculated using the corresponding  
668 Goldbeter-Koshland function for each genotype.

| Parameter           | Value | Literature        | Source                            |
|---------------------|-------|-------------------|-----------------------------------|
| $k_r/k_p$           | 1     | 0.75              | <i>Shimizu et al. (2010)</i>      |
| $k_{dp}/k_p$        | 2     | $k_p = 0.37^{-1}$ | <i>Kentner and Sourjik (2009)</i> |
| $K_r$               | 0.03  | $\ll 1$           | <i>Emonet and Cluzel (2008)</i>   |
| $K_b$               | 0.03  | $\ll 1$           | <i>Emonet and Cluzel (2008)</i>   |
| $K_b(\text{CheBc})$ | 0.2   | $\ll 1$           |                                   |
| M (WT)              | 15    | 100               | <i>Anand and Stock (2002)</i>     |
| M (CheBc)           | 7     | 15                | <i>Simms et al. (1985)</i>        |

**Table 4.** List of parameters used for Goldbeter-Koshland description of CheB phosphorylation feedback.

## 669 References

- 670 **Adler J.** Chemotaxis in bacteria. *Science*. 1966 Aug; 153(3737):708–716. [http://dx.doi.org/10.1126/science.153.](http://dx.doi.org/10.1126/science.153.3737.708)  
671 [3737.708](http://dx.doi.org/10.1126/science.153.3737.708), doi: 10.1126/science.153.3737.708.
- 672 **Alon U, Surette MG, Barkai N, Leibler S.** Robustness in bacterial chemotaxis. *Nature*. 1999 Jan; 397(6715):168–  
673 171. <http://dx.doi.org/10.1038/16483>, doi: 10.1038/16483.
- 674 **Ames P, Studdert CA, Reiser RH, Parkinson JS.** Collaborative signaling by mixed chemoreceptor teams in  
675 *Escherichia Coli*. *PNAS*. 2002; 99:7060–65. doi: 10.1073/pnas.092071899.
- 676 **Amin D, Hazelbauer G.** Chemoreceptors in signalling complexes: shifted conformation and asymmetric coupling.  
677 *Mol Microbiol*. 2010 Dec; 78:1313–23. doi: 10.1111/j.1365-2958.2010.07408.x.
- 678 **Anand GS, Stock AM.** Kinetic Basis for the Stimulatory Effect of Phosphorylation on the Methyltransferase Activity  
679 of CheB. *Biochemistry*. 2002; 41:6752–6760.
- 680 **Barkai N, Alon U, Leibler S.** Robust amplification in adaptive signal transduction networks. *C R Acad Sci Paris,*  
681 *Série IV*. 2001; p. 871–877.
- 682 **Barkai N, Leibler S.** Robustness in simple biochemical networks. *Nature*. 1997 Jun; 387(6636):913–917.  
683 <http://dx.doi.org/10.1038/43199>, doi: 10.1038/43199.
- 684 **Berg HC, Brown DA.** Chemotaxis in *Escherichia coli* analysed by Three-dimensional Tracking. *Nature*. 1972 Oct;  
685 239(5374):500–504. <http://dx.doi.org/10.1038/239500a0>, doi: 10.1038/239500a0.
- 686 **Berg HC, Tedesco PM.** Transient Response to Chemotactic Stimuli in *Escherichia coli*. *PNAS*. 1975 Aug; 72(8):3235–  
687 3239. <http://dx.doi.org/10.1073/pnas.72.8.3235>, doi: 10.1073/pnas.72.8.3235.
- 688 **Block S, Segall J, Berg H.** Impulse responses in bacterial chemotaxis. *Cell*. 1982; 31:215–26.
- 689 **Borczuk A, Staub A, Stock J.** Demethylation of bacterial chemoreceptors is inhibited by attractant stimuli in the  
690 complete absence of the regulatory domain of the demethylating enzyme. *Biochem Biophys Res Commun*.  
691 1986 Dec; 141:918–23.
- 692 **Bray D, Levin MD, Morton-Firth CJ.** Receptor clustering as a cellular mechanism to control sensitivity. *Nature*.  
693 1998 05; 393(6680):85–88. <http://dx.doi.org/10.1038/30018>.
- 694 **Celani A, Vergassola M.** Nonlinearity, Fluctuations, and Response in Sensory Systems. *Physical Review*  
695 *Letters*. 2012 Jun; 108:258102+. [http://dx.doi.org/10.1103/phys-](http://dx.doi.org/10.1103/physrevlett.108.258102)  
696 [revlett.108.258102](http://dx.doi.org/10.1103/physrevlett.108.258102), doi: 10.1103/phys-
- 697 **Clausznitzer D, Oleksiuk O, Løvdok L, Sourjik V, Endres RG.** Chemotactic Response and Adaptation Dynamics in  
698 *Escherichia Coli*. *PLoS Computational Biology*. 2010 May; 6(5):e1000784+. [http://dx.doi.org/10.1371/journal.](http://dx.doi.org/10.1371/journal.pcbi.1000784)  
699 [pcbi.1000784](http://dx.doi.org/10.1371/journal.pcbi.1000784), doi: 10.1371/journal.pcbi.1000784.
- 700 **Cluzel P, Surette M, Leibler S.** An Ultrasensitive Bacterial Motor Revealed by Monitoring Signaling Proteins in  
701 Single Cells. *Science*. 2000 Mar; 287(5458):1652–1655. <http://dx.doi.org/10.1126/science.287.5458.1652>, doi:  
702 [10.1126/science.287.5458.1652](http://dx.doi.org/10.1126/science.287.5458.1652).
- 703 **Crocker, Grien.** Methods of Digital Video Microscopy for Colloidal Studies. *Journal of colloid and interface*  
704 *science*. 1996; (179):298–310.

- 705 **Djordjevic S**, Goudreau PN, Xu Q, Stock AM, West AH. Structural basis for methyltransferase CheB regulation by a  
706 phosphorylation-activated domain. PNAS. 1998 February; 95:1381–1386.
- 707 **Dufour Y**, Gillet S, Frankel N, Weibel D, Emonet T. Direct Correlation between Motile Behavior and Protein  
708 Abundance in Single Cells. PLoS Comput Biol. 2016; 12. doi: [10.1371/journal.pcbi.1005041](https://doi.org/10.1371/journal.pcbi.1005041).
- 709 **Duke T**, Bray D. Heightened sensitivity of a lattice of membrane receptors. PNAS. 1999; 96:10104–8. doi:  
710 [10.1073/pnas.96.18.10104](https://doi.org/10.1073/pnas.96.18.10104).
- 711 **Eldar A**, Elowitz MB. Functional roles for noise in genetic circuits. Nature. 2010 Sep; 467(7312):167–173.  
712 <http://dx.doi.org/10.1038/nature09326>, doi: 10.1038/nature09326.
- 713 **Elowitz MB**, Levine AJ, Siggia ED, Swain PS. Stochastic Gene Expression in a Single Cell. Science. 2002 Aug;  
714 297(5584):1183–1186. <http://dx.doi.org/10.1126/science.1070919>, doi: [10.1126/science.1070919](https://doi.org/10.1126/science.1070919).
- 715 **Emonet T**, Cluzel P. Relationship between cellular response and behavioral variability in bacterial  
716 chemotaxis. PNAS. 2008 Mar; 105(9):3304–3309. <http://dx.doi.org/10.1073/pnas.0705463105>, doi:  
717 [10.1073/pnas.0705463105](https://doi.org/10.1073/pnas.0705463105).
- 718 **Flores M**, Shimizu TS, ten Wolde PR, Tostevin F. Signaling Noise Enhances Chemotactic Drift of *E. coli*. Physical  
719 Review Letters. 2012 Oct; 109:148101+. <http://dx.doi.org/10.1103/physrevlett.109.148101>, doi: [10.1103/physrevlett.109.148101](https://doi.org/10.1103/physrevlett.109.148101).
- 720
- 721 **Frankel NW**, Pontius W, Dufour YS, Long J, Hernandez-Nunez L, Emonet T, Marder E. Adaptability of non-genetic  
722 diversity in bacterial chemotaxis. eLife. 2014 Oct; p. e03526+. <http://dx.doi.org/10.7554/elife.03526>, doi:  
723 [10.7554/elife.03526](https://doi.org/10.7554/elife.03526).
- 724 **Gillespie DT**. The mathematics of Brownian motion and Johnson noise. American Journal of Physics. 1996  
725 March; 64:225–240.
- 726 **Goldbeter A**, Koshland DE. An amplified sensitivity arising from covalent modification in biological systems.  
727 PNAS. 1981 Nov; 78(11):6840–6844. <http://dx.doi.org/10.1073/pnas.78.11.6840>, doi: [10.1073/pnas.78.11.6840](https://doi.org/10.1073/pnas.78.11.6840).
- 728 **Kalinin Y**, Neumann S, S V, Wu M. Responses of Escherichia coli bacteria to two opposing chemoattractant  
729 gradients depend on the chemoreceptor ratio. Journal of Bacteriology. 2010; 192(7):1796–1800.
- 730 **Kentner D**, Sourjik V. Dynamic map of protein interactions in the Escherichia Coli chemotaxis pathway. Molecular  
731 Systems Biology. 2009; .
- 732 **Keymer JE**, Endres RG, Skoge M, Meir Y, Wingreen NS. Chemosensing in Escherichia coli: Two regimes of  
733 two-state receptors. Proceedings of the National Academy of Sciences. 2006 Feb; 103(6):1786–1791. <http://dx.doi.org/10.1073/pnas.0507438103>, doi: [10.1073/pnas.0507438103](https://doi.org/10.1073/pnas.0507438103).
- 734
- 735 **Kitanovic S**, Ames P, Parkinson JS. A Trigger Residue for Transmembrane Signaling in the Escherichia coli Serine  
736 Chemoreceptor. J Bacteriology. 2015 Aug; 197:2568–79. doi: [10.1128/JB.00274-15](https://doi.org/10.1128/JB.00274-15).
- 737 **Kollmann M**, Løvdok L, Bartholomé K, Timmer J, Sourjik V. Design principles of a bacterial signalling network.  
738 Nature. 2005 Nov; 438(7067):504–507. <http://dx.doi.org/10.1038/nature04228>, doi: 10.1038/nature04228.
- 739 **Korobkova E**, Emonet T, Vilar JM, Shimizu TS, Cluzel P. From molecular noise to behavioural variability in a single  
740 bacterium. Nature. 2004 Apr; 428(6982):574–578. doi: 10.1038/nature02404.



- 741 **Lazova MD**, Ahmed T, Bellomo D, Stocker R, Shimizu TS. Response Rescaling in Bacterial Chemotaxis. *PNAS*.  
742 2011; 108(33):13870–75.
- 743 **Lazova MD**, Butler MT, Shimizu TS, Harshey RM. Salmonella chemoreceptors McpB and McpC mediate a  
744 repellent response to L-cystine: a potential mechanism to avoid oxidative conditions. *Molecular Microbiology*.  
745 2012 May; 4(84):697–711.
- 746 **Li GW**, Burkhardt D, Gross C, Weissman JS. Quantifying absolute protein synthesis rates reveals principles  
747 underlying allocation of cellular resources. *Cell*. 2014 apr; 157(3):624–35. [http://www.ncbi.nlm.nih.gov/  
748 pubmed/24766808](http://www.ncbi.nlm.nih.gov/pubmed/24766808), doi: 10.1016/j.cell.2014.02.033.
- 749 **Li M**, Hazelbauer GL. Cellular stoichiometry of the components of the chemotaxis signaling complex. *Journal*  
750 *of bacteriology*. 2004 Jun; 186(12):3687–3694. <http://dx.doi.org/10.1128/jb.186.12.3687-3694.2004>, doi:  
751 10.1128/jb.186.12.3687-3694.2004.
- 752 **Liberman L**, Berg HC, Sourjik V. Effect of Chemoreceptor Modification on Assembly and Activity of the Receptor-  
753 Kinase Complex in *Escherichia Coli*. *J of Bacteriology*. 2004 Aug; 186(19):6643–46. doi: 10.1038/262467a0.
- 754 **Lupas A**, Stock J. Phosphorylation of N-terminal Regulatory Domain Activates the CheB Methyltransferase in  
755 Bacterial Chemotaxis. *J of Biological Chemistry*. 1989 October; 264:17337–17342.
- 756 **Masson JB**, Voisinne G, Wong-Ng J, Celani A, Vergassola M. Noninvasive inference of the molecular chemotactic  
757 response using bacterial trajectories. *PNAS*. 2012 Jan; 109:1802–7. doi: 10.1073/pnas.1116772109.
- 758 **Mello B**, Shaw LB, Tu Y. Effects of Receptor Interaction in Bacterial Chemotaxis. *Biophysical Journal*. 2004 Oct;  
759 87:1578–95.
- 760 **Mello BA**, Tu Y. An allosteric model for heterogeneous receptor complexes: Understanding bacterial chemotaxis  
761 responses to multiple stimuli. *PNAS*. 2005 Nov; 102(48):17354–17359. [http://dx.doi.org/10.1073/pnas.  
762 0506961102](http://dx.doi.org/10.1073/pnas.0506961102), doi: 10.1073/pnas.0506961102.
- 763 **Mello BA**, Tu Y. Effects of adaptation in maintaining high sensitivity over a wide range of backgrounds for *Es-*  
764 *cherichia Coli* chemotaxis. *Biophysical journal*. 2007 Apr; 92(7):2329–2337. doi: 10.1529/biophysj.106.097808.
- 765 **Mesibov R**, Ordal GW, Adler J. The Range of Attractant Concentrations for Bacterial Chemotaxis and the  
766 Threshold and Size of Response over This Range. *The Journal of General Physiology*. 1973; 62(2):203–223.  
767 <http://jgp.rupress.org/content/62/2/203>, doi: 10.1085/jgp.62.2.203.
- 768 **Min TL**, Mears PJ, Golding I, Chemla YR. Chemotactic adaptation kinetics of individual *Escherichia Coli* cells.  
769 *PNAS*. 2012 june; .
- 770 **Neumann S**, Vladimirov N, Krembel AK, Wingreen NS, Sourjik V. Imprecision of adaptation in *Escherichia Coli*  
771 chemotaxis. *PLoS ONE*. 2014; 9(1):1–6.
- 772 **Oleksiuk O**, Jakovljevic V, Vladimirov N, Carvalho R, Paster E, Ryu WS, Meir Y, Wingreen NS, Kollmann M, Sourjik  
773 V. Thermal Robustness of Signaling in Bacterial Chemotaxis. *Cell*. 2011 Apr; 145(2):312–321.
- 774 **Ozbudak EM**, Thattai M, Kurtser I, Grossman AD, Van Oudenaarden A. Regulation of noise in the expression of  
775 a single gene. *Nature genetics*. 2002 May; 31(1):69–73. doi: 10.1038/ng869.
- 776 **Park H**, Pontius W, Guet CC, Marko JF, Emonet T, Cluzel P. Interdependence of behavioural variability and  
777 response to small stimuli in bacteria. *Nature*. 2010 Dec; 468(7325):819–823. [http://dx.doi.org/10.1038/  
778 nature09551](http://dx.doi.org/10.1038/nature09551), doi: 10.1038/nature09551.

- 779 **Parkinson JS**, Hazelbauer GL, Falke JJ. Signaling and sensory adaptation in Escherichia Coli chemoreceptors:  
780 2015 update. *Trends in Microbiology*. 2015; 23(5):257–266. <http://dx.doi.org/10.1016/j.tim.2015.03.003>.
- 781 **Raj**, Van Oudenaarden A. Nature, nurture, or chance: stochastic gene expression and its consequences.  
782 *Cell*. 2008 oct; 135(2):216–26. [http://www.pubmedcentral.nih.gov/articlerender.fcgi?artid=3118044&tool=](http://www.pubmedcentral.nih.gov/articlerender.fcgi?artid=3118044&tool=pmcentrez&rendertype=abstract)  
783 [pmcentrez&rendertype=abstract](http://www.pubmedcentral.nih.gov/articlerender.fcgi?artid=3118044&tool=pmcentrez&rendertype=abstract), doi: 10.1016/j.cell.2008.09.050.
- 784 **Rao C**, Wolf DM, Arkin AP. Control, exploitation and tolerance of intracellular noise. *Nature*. 2002 11;  
785 420(6912):231–237. <http://dx.doi.org/10.1038/nature01258>.
- 786 **Raser JM**, O’Shea EK. Control of Stochasticity in Eukaryotic Gene Expression. *Science*. 2004; 304:1811–14. doi:  
787 [10.1126/science.1098641](https://doi.org/10.1126/science.1098641).
- 788 **Salis HM**, Mirsky EA, Voigt CA. Automated design of synthetic ribosome binding sites to control protein  
789 expression. *Nature Biotechnology*. 2009; .
- 790 **Salman H**, Libchaber A. A concentration-dependent switch in the bacterial response to temperature. *Nature*  
791 *Cell Biology*. 2007; 9(9):1098–1100. doi: 10.1038/ncb1632.
- 792 **Scharf BE**, Fahrner KA, Turner L, Berg HC. Control of direction of flagellar rotation in bacterial chemotaxis. *PNAS*.  
793 1998; 95:201–206.
- 794 **Segall JE**, Block SM, Berg HC. Temporal Comparisons in Bacterial Chemotaxis. *PNAS*. 1986; p. 8987–8991.
- 795 **Shimizu TS**, Aksenov SV, Bray D. A spatially extended stochastic model of the bacterial chemotaxis signalling  
796 pathway. *Journal of molecular biology*. 2003 May; 329(2):291–309. [http://view.ncbi.nlm.nih.gov/pubmed/](http://view.ncbi.nlm.nih.gov/pubmed/12758077)  
797 [12758077](http://view.ncbi.nlm.nih.gov/pubmed/12758077).
- 798 **Shimizu TS**, Tu Y, Berg HC. A modular gradient-sensing network for chemotaxis in Escherichia coli revealed by  
799 responses to time-varying stimuli. *Molecular Systems Biology*. 2010 Jun; 6. [http://dx.doi.org/10.1038/msb.](http://dx.doi.org/10.1038/msb.2010.37)  
800 [2010.37](http://dx.doi.org/10.1038/msb.2010.37), doi: 10.1038/msb.2010.37.
- 801 **Shimizu TS**, Delalez N, Pichler K, Berg HC. Monitoring bacterial chemotaxis by using bioluminescence resonance  
802 energy transfer: absence of feedback from the flagellar motors. *PNAS*. 2006; .
- 803 **Simms SA**, Keane MG, Stock J. Multiple forms of the CheB methyl-esterase in Bacterial Chemosensing. *J of*  
804 *Biological Chemistry*. 1985 August; 260:10161–10168.
- 805 **Sneddon MW**, Emonet T. Modeling cellular signaling: taking space into the computation. *Nat Meth*. 2012 Mar;  
806 9(3):239–242. doi: 10.1038/nmeth.1900.
- 807 **Sourjik V**, Vaknin A, Shimizu TS, Berg HC. In vivo measurement by FRET of pathway activity in bacterial  
808 chemotaxis. *Methods Enzymology*. 2007; (423):365–91.
- 809 **Sourjik V**, Berg HC. Binding of the Escherichia coli response regulator CheY to its target measured in vivo by  
810 fluorescence resonance energy transfer. *PNAS*. 2002 Oct; 99(20):12669–12674. [http://dx.doi.org/10.1073/](http://dx.doi.org/10.1073/pnas.192463199)  
811 [pnas.192463199](http://dx.doi.org/10.1073/pnas.192463199), doi: 10.1073/pnas.192463199.
- 812 **Sourjik V**, Berg HC. Receptor sensitivity in bacterial chemotaxis. *PNAS*. 2002 Jan; 99(1):123–127. [http://dx.doi.](http://dx.doi.org/10.1073/pnas.011589998)  
813 [org/10.1073/pnas.011589998](http://dx.doi.org/10.1073/pnas.011589998), doi: 10.1073/pnas.011589998.
- 814 **Sourjik V**, Berg HC. Functional interactions between receptors in bacterial chemotaxis. *Nature*. 2004 Mar;  
815 428(6981):437–441. <http://dx.doi.org/10.1038/nature02406>, doi: 10.1038/nature02406.

- 816 **Spudich JL**, Koshland DE. Non-genetic individuality: chance in the single cell. *Nature*. 1976 Aug; 262(5568):467–  
817 471. <http://dx.doi.org/10.1038/262467a0>, doi: 10.1038/262467a0.
- 818 **Stewart RC**. Activating and inhibitory mutations in the regulatory domain of CheB, the methylesterase in  
819 bacterial chemotaxis. *J of Biological Chemistry*. 1993 January; 268:1921–1930.
- 820 **Stewart RC**, Roth AF, Dahlquist FW. Mutations that affect control of the methylesterase activity of CheB, a  
821 component of the chemotaxis adaptation system in *E. Coli*. *J of Bacteriology*. 1990 June; 172:3388–3399.
- 822 **Taniguchi Y**, Choi PJ, Li GW, Chen H, Babu M, Hearn J, Emili A, Xie XS. Quantifying *E. Coli* Proteome and  
823 Transcriptome with Single-Molecule Sensitivity in Single Cells. *Science*. 2010; 329(5991):533–539. <http://www.pubmedcentral.nih.gov/articlerender.fcgi?artid=2922915&tool=pmcentrez&rendertype=abstract>.  
824
- 825 **Taylor BL**, Koshland DE. Electron taxis and blue light effect on bacterial chemotaxis. *Journal of Bacteriology*.  
826 1975; 123:557–569.
- 827 **Taylor BL**, Miller JB, Warrick HM, Koshland DE. Electron acceptor taxis and blue light effect on bacterial  
828 chemotaxis. *Journal of Bacteriology*. 1979; 140:567–573.
- 829 **Terwilliger T**, Wang J, Koshland D. Kinetics of Receptor Modification. *Journal of Biol Chemistry*. 1986; 261:10814–  
830 20.
- 831 **Tu Y**. Quantitative Modeling of Bacterial Chemotaxis: Signal Amplification and Accurate Adaptation. *Annual*  
832 *Review of Biophysics*. 2013 February; 42:337–359.
- 833 **Tu Y**, Shimizu TS, Berg HC. Modeling the chemotactic response of *Escherichia coli* to time-varying stimuli. *PNAS*.  
834 2008 Sep; 105(39):14855–14860. <http://dx.doi.org/10.1073/pnas.0807569105>, doi: 10.1073/pnas.0807569105.
- 835 **Tu Y**, Grinstein G. How White Noise Generates Power-Law Switching in Bacterial Flagellar Motors. *Phys*  
836 *Rev Lett*. 2005 May; 94:208101. <http://link.aps.org/doi/10.1103/PhysRevLett.94.208101>, doi: 10.1103/Phys-  
837 *RevLett.94.208101*.
- 838 **Tyson JJ**, Chen KC, Novak B. Sniffers, buzzers, toggles and blinkers: dynamics of regulatory and signaling  
839 pathways in the cell. *Current Opinion in Cell Biology*. 2003 Apr; 15(2):221–231. [http://view.ncbi.nlm.nih.gov/  
840 pubmed/12648679](http://view.ncbi.nlm.nih.gov/pubmed/12648679).
- 841 **Vaknin A**, Berg HC. Single Cell FRET imaging of phosphatase activity in the *Escherichia coli* chemotaxis system.  
842 *PNAS*. 2004 Dec; 101(49):170272–7.
- 843 **Van Kampen NG**. *Stochastic Processes in Physics and Chemistry*. Elsevier Science; 1981. [http://www.amazon.  
844 com/exec/obidos/redirect?tag=citeulike07-20&path=ASIN/0444866507](http://www.amazon.com/exec/obidos/redirect?tag=citeulike07-20&path=ASIN/0444866507).
- 845 **Viswanathan G**, Buldyrev S, Havlin S, da Luz MGE, Raposo E, Stanley HE. Optimizing the success of random  
846 searches. *Nature*. 1999; 401:911–914. doi: 10.1038/44831.
- 847 **Wadhams GH**, Armitage JP. Making sense of it all: bacterial chemotaxis. *Nature Reviews Molecular Cell Biology*.  
848 2004 Dec; 5(12):1024–1037. doi: 10.1038/nrm1524.
- 849 **Waite AJ**, Frankel NW, Dufour YS, Johnston JF, Long J, Emonet T. Non-genetic diversity modulates population  
850 performance. *Molecular Systems Biology*. 2016; 12.
- 851 **Wright S**, Walia B, Parkinson JS, Khan S. Differential activation of *Escherichia coli* chemoreceptors by blue-light  
852 stimuli. *Journal of bacteriology*. 2006 Jun; 188(11):3962–3971.

- 853 **Yang Y**, Pollard AM, Höfler C, Gernot Poschet G, Wirtz R M and Hell, Sourjik V. Relation between chemotaxis and  
854 consumption of Amino Acids in bacteria. *Molecular Microbiology*. 2015; 96:1272–1282.
- 855 **Yoney A**, Salman H. Precision and Variability in Bacterial Temperature Sensing. *Biophysical Journal*. 2015;  
856 108(May).
- 857 **Yuan J**, Berg H. Ultrasensitivity of an adaptive bacterial motor. *J Mol Biol*. 2013 May; 425:1760–4. doi:  
858 [10.1016/j.jmb.2013.02.016](https://doi.org/10.1016/j.jmb.2013.02.016).
- 859 **Yuan J**, Branch RW, Hosu BG, Berg HC. Adaptation at the output of the chemotaxis signalling pathway. *Nature*.  
860 2012 Apr; 484(7393):233–236. <http://dx.doi.org/10.1038/nature10964>, doi: 10.1038/nature10964.

861 **Acknowledgments**

862 We thank Simone Boskamp for cell culture, Marco Kamp for microscopy assistance and Marco  
863 Konijnenburg, Luc Blom and Eric Clay for software and electronic support. We also thank Pieter de  
864 Haan and Istvan Kleijn for help with initial measurements and William Pontius for useful discussions.  
865 We thank Sandy Parkinson and Germán Piñas for many useful discussion and a critical reading of  
866 the manuscript.

867 **Competing interests**

868 The authors declare they have no financial or non-financial competing interests.

869 Main Figures

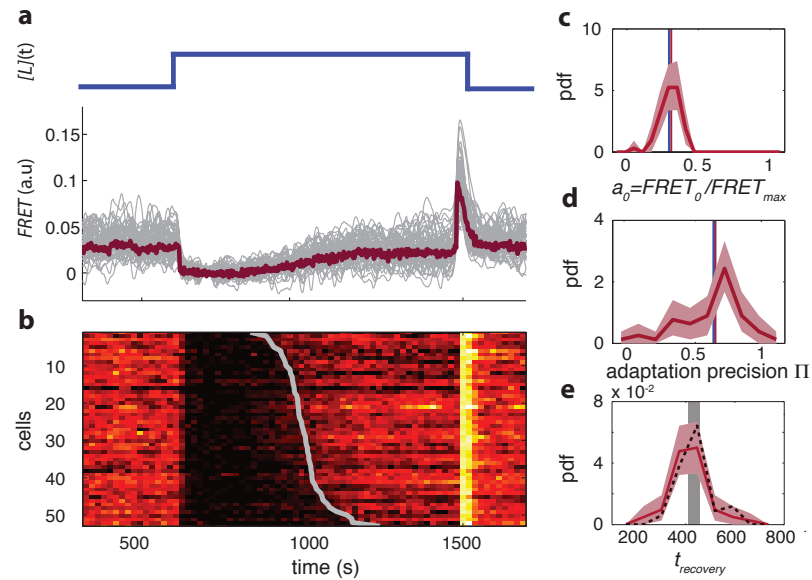

**Figure 1.** Single-cell FRET over extended times reveals cell-to-cell variability in signaling response. **(a)** Step-response experiment on wildtype cells (CheRB+; VS115). (Top) The ligand time series  $[L](t)$  indicates the applied temporal protocol for addition and removal of  $500 \mu\text{M}$  MeAsp. (Bottom) FRET response of 54 cells (grey) with the ensemble-averaged time series (dark red) overlaid. Single-cell time series were lowpass filtered with a 14s moving-average filter. **(b)** Heatmap representation of the normalized FRET response time series, with each row representing a single cell, and successive columns representing the 10s time bins in which the color-indicated activity was computed from the FRET time series. Activity was computed by normalizing FRET to the total response amplitude (Max-Min for each time series). Rows are sorted by the corresponding cell's recovery time (grey curve), defined as the time at which the activity recovered to 50 % of the activity level after adaptation (see panel e). **(c)** Steady-state activity  $a_0$  of the cells shown in panels (a-b). Also shown are the mean steady-state activity (red vertical line) and the steady-state activity of the population averaged time series (blue vertical line). **(d)** Adaptation precision  $\Pi$  obtained from the FRET data. An adaptation precision of 1 denotes perfect adaptation. Also shown are the mean precision (red vertical line) and the precision of the population averaged time series (blue vertical line). The mean and std of the distribution is  $0.79 \pm 0.32$ . All colored shaded areas refer to 95 % confidence intervals obtained through bootstrapping. **(e)** Recovery time of cells defined as recovery to 50% of the post-adaptational activity level (red, 54 cells) or 50% of pre-stimulus activity (black dashed, 44 cells with precision  $>0.5$ ) and simulated effect of experimental noise for a population with identical recovery times (grey). The latter was obtained from a simulated data set in which 55 time series were generated as described in Fig. S2. The width of the bar is defined by the mean plus (minus) the std of the simulated distribution. The mean and std of the distributions for the experimental and simulated data sets are respectively  $416 \pm 83$  and  $407 \pm 35$ .

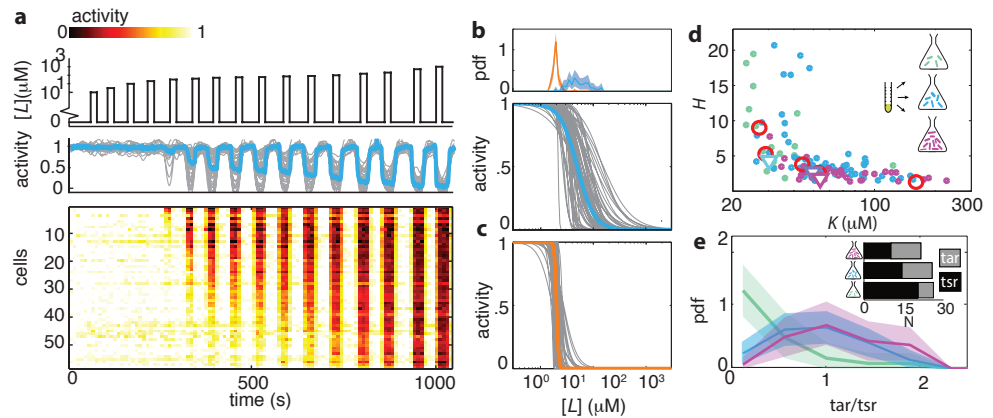

**Figure 2.** Ligand dose-response parameters vary strongly across cells in an isogenic population, even in the absence of adaptation. **(a)** Single-cell dose-response experiment on adaptation deficient (CheRB-; TSS58) cells with a wildtype complement of receptors. (Top) Temporal protocol of stimulation  $[L](t)$  by the attractant L-serine. (Middle) The ensemble-averaged FRET response of the population (blue) and single cells (gray) in signaling activity of 59 cells, normalized to the full-scale FRET response amplitude. (Bottom) Heatmap representation of the single-cell FRET timeseries, with the rows sorted by the sensitivity  $K$  of the corresponding cell obtained from Hill-curve fits. **(b)** Family of dose response curves (gray) obtained from the Hill-curve fits to single-cell dose-response data. CheRB- cells with a wildtype complement of receptors (TSS58). The blue curve was obtained from fitting a hill function to the population-averaged time series shown in panel (a), yielding fit values  $K=50 \mu\text{M}$  and  $H=2.7$ . The fitted single-cell  $K$  values are shown in the histogram on top (blue). **(c)** CheRB- cells expressing only the serine receptor Tsr (UU2567). The orange curve was obtained from fits to the population average, yielding  $K=20 \mu\text{M}$  and  $H=22$ . The fitted single-cell  $K$  values are shown in the histogram in panel (b) (orange). **(d)** Cells from a single overnight culture were inoculated into three flasks harvested at different times during batch-culture growth to sample the state of the population at three points along the growth curve: at  $\text{OD}_{600}=0.31$  (green), 0.45 (blue) and 0.59 (purple). Hill-curve sensitivity  $K$  and cooperativity  $H$  obtained from fits to the single-cell time series, at different OD's. Shown are 25 out of 28 cells harvested at  $\text{OD}=0.31$ , 59 out of 64 cells at  $\text{OD}=0.45$ , 34 out of 40 cells at  $\text{OD}=0.59$ . The excluded cells had a mean squared error higher than 0.05. **(e)** Histograms of Tar/Tsr ratio obtained from fit of multi-species MWC model from reference *Mello and Tu (2005)* to single-cell FRET time series. The mean Tar/Tsr ratios (low to high OD) are 0.4, 0.9, and 1.2 with coefficients of variance of respectively 1.1, 0.5, and 0.4. Inset: average cluster size of Tar (grey) and Tsr (black) at different harvesting OD's obtained from the fit results in panel d.



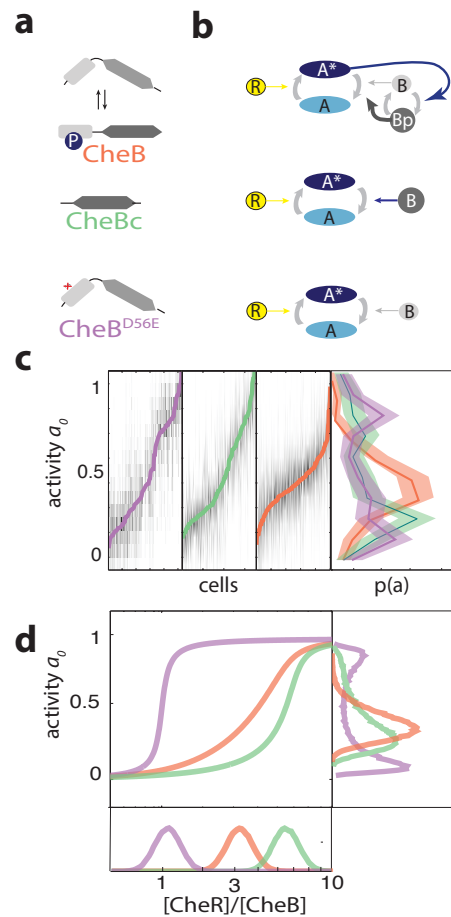

**Figure 3.** CheB phosphorylation feedback attenuates variability in steady-state kinase activity. **(a)** Schematic depiction of CheB activation by phosphorylation. (Top) CheB consists of two domains connected by a flexible linker. The aspartate at residue 56 can be phosphorylated. (Middle) CheBc lacks the receiver domain with the phosphorylation site. (Bottom) CheB-D56E carries a point mutation at the phosphorylation site. **(b)** Effective network topology of cells expressing WT CheB (top), CheBc (middle) and CheB-D56E (bottom). **(c)** Heatmaps showing distributions of activity  $a(t)$  of one cell (normalized to Max-Min for each time series) in each column for each CheB mutant in a *cheB* background (VS124, colors as in panel (a)) with the steady-state activity  $a_0$  superimposed. (right) Histograms with  $a_0$  for each CheB mutant. All histograms contain the results for cells with a signal-to-noise ratio higher than 1, which corresponds to 322 out of 373 cells (WT), 225 out of 279 cells (CheBc) and 226 out of 359 cells (D56E). Shaded regions represent bootstrapped 95% confidence intervals. **(d)** A simple kinetic model of the chemotaxis network illustrates the crucial role of CheB phosphorylation feedback in circumventing detrimental bimodality in  $a_0$ . Due to saturated enzyme kinetics in the adaptation system, the transfer function between  $[\text{CheR}]/[\text{CheB}]$  expression ratio and steady-state network output  $a_0$  can be highly nonlinear (main panel). The shape of this transfer function determines the distribution of  $a_0$  (right panel) by transforming the distribution of  $[\text{CheR}]/[\text{CheB}]$  expression ratios (bottom panel). Shown are a CheB version with lower activity as WT (purple) and higher than WT (green), both without feedback, and one CheB species with phosphorylation feedback (orange).

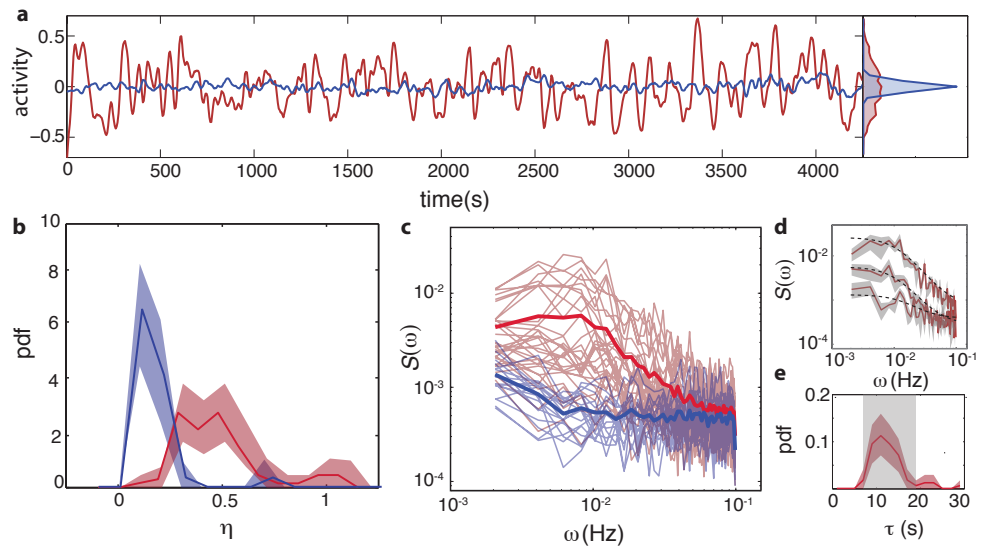

**Figure 4.** Temporal signal fluctuations in the absence of ligand stimulation are generated by stochastic activity of the adaptation enzymes CheR/CheB. **(a)** Representative single-cell FRET time series of steady-state fluctuations in the presence (CheRB+, VS115, red) and absence (RB-, TSS58, blue) of adaptation kinetics in normalized activity units. **(b)** Histogram of fluctuation amplitude  $\eta$  for both CheRB+ (70 cells, red) and CheRB- (33 cells, blue), extracted from calculating the standard deviation of a low-pass filtered FRET time series over a 10s window divided by the mean FRET level of a single cell. The shaded areas represents the 95% confidence interval obtained from bootstrapping. **(c)** Power spectral density (PSD) computed from single-cell FRET time series of 31 CheRB+ cells (red) and 17 CheRB- cells (blue), each from a single experiment. Thin curves in the lighter shade of each color represent Single-cell spectra, and the thick curves in the darker shade are the average of all single-cell spectra for each genotype. **(d)** Representative single-cell PSDs and fits by an Ornstein-Uhlenbeck (O-U) process. Shown are O-U fits (Lorentzian with constant noise floor; dashed curves) to three single-cell PSDs (solid curves). The shaded area represents the standard error of the mean for PSDs computed from nine non-overlapping segments of each single-cell time series. **(e)** Histogram of fluctuation timescales  $\tau$  extracted from single-cell PSD fits (red, 70 cells from three independent experiments). The shaded areas represents the 95% confidence interval obtained from bootstrapping. The grey shaded area refers to the variability (mean $\pm$ std) that can be explained by experimental noise and a finite time window, obtained through simulated O-U time series (see [Materials and Methods](#))

870 Supplemental Information

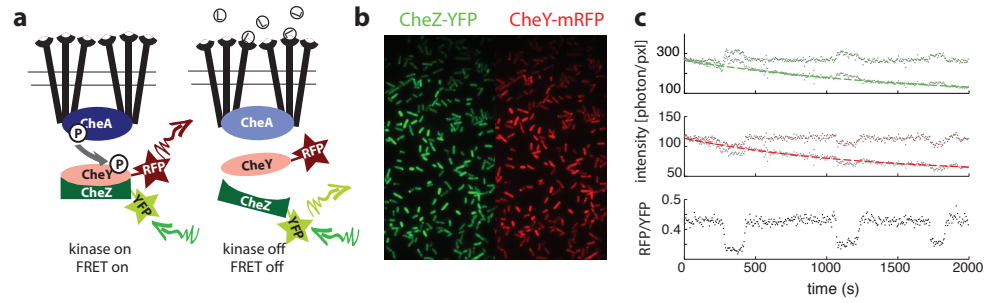

**Figure S1. a)** Schematic of FRET assay to measure *in vivo* kinase activity. In absence of ligand stimuli, receptors are activating CheA. When active, CheA phosphorylates CheY, increasing interaction between CheY and phosphatase CheZ and thereby increasing FRET through the labeled fluorophores. Ligand-receptor binding shuts down the kinase, which ceases phosphate transfer and FRET levels decrease. **b)** False-color images of donor (CheZ-YFP) and acceptor (CheY-mRFP1) fluorescence, channels projected on the same EM-CCD camera chip. **c)** Example time series fluorescence from a single cell (CheRB-,VS149/pVS149/52). In grey raw data is shown, with a fit to a single exponential function with offset overlaid for donor (top, green) and acceptor channel (middle, red). From the corrected fluorescence intensities the ratio RFP/YFP is calculated (bottom).

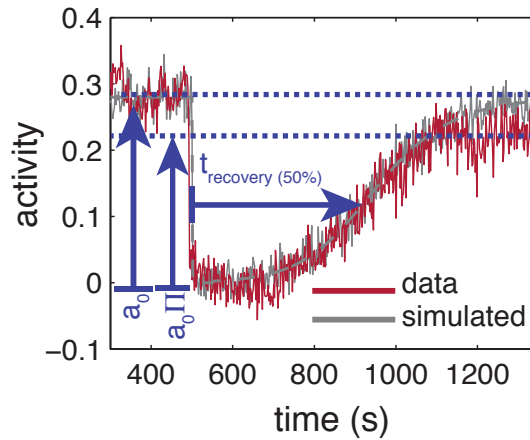

**Figure S2.** Cell-to-cell variability in recovery times and steady-state activity. **(a)** Simulated time series for are calculated by integrating the linearized MWC model with adaptation kinetics (*Tu et al., 2008*) with parameters chosen to closely approximate the population averaged response (grey-dashed line). To the simulated time series of each cell gaussian white noise ( $\mu = 0; \sigma = 0.15$ ) is added to approximate the noise level of the experiment. Also shown are the baseline and recovery levels (blue dashed lines) of the experimental population.

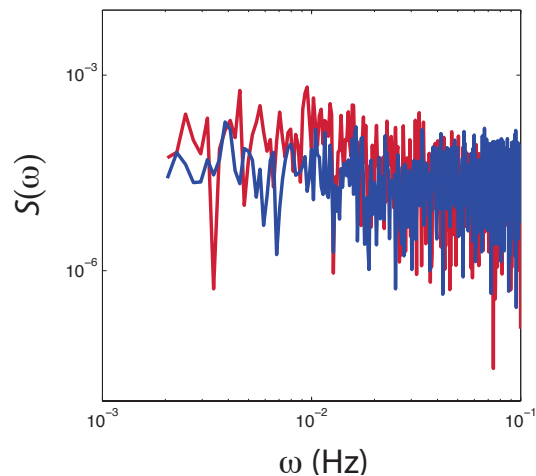

**Figure S3.** Power spectral density estimates from population averaged time series of CheRB+ (red) and CheRB- cells (blue). The time series are from the same experiment as shown in Figure 3b

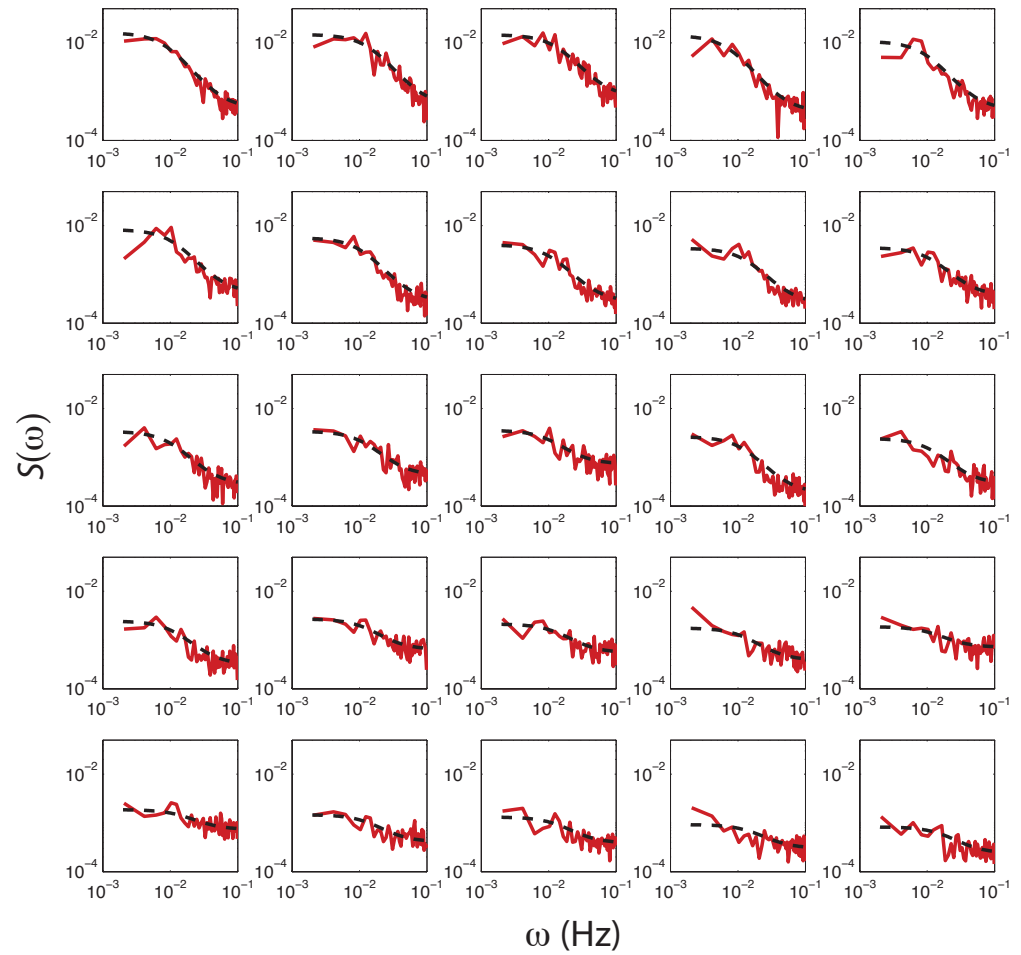

**Figure S4.** PSD estimates obtained from single-cell FRET time series (red dashed curve) with fits of O-U process to PSD estimates to 25 out of 31 cells (black dashed curve) from a single experiment shown in Figure 3b. The cells are sorted by variance calculated from the fit ( $cx/2$ ), with top-left having the highest. The excluded cells could not properly be fit because the low frequency noise did not exceed the experimental noise floor, defined as lower than 5 times the standard deviation of the noise floor.

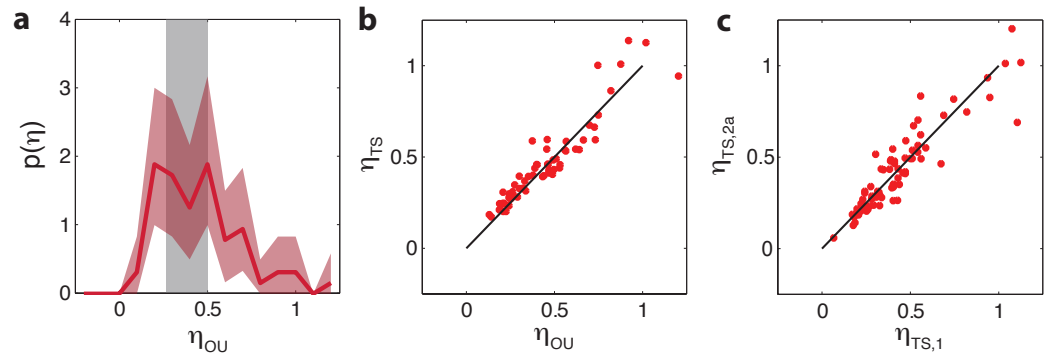

**Figure S5.** **a** Noise amplitude  $\eta_{OU}$  for 70 CheRB+ cells time series (from 3 experiments) obtained with mean noise level of 0.42. The grey shaded area indicates the expected noise amplitude variability based on a finite time window and experimental noise in the experiment. The width is defined as the mean plus (minus) one standard deviation of the distribution of noise amplitudes obtained from simulated OU timeseries. **b** Noise amplitude  $\eta_{OU}$  obtained from fits of Ornstein-Uhlenbeck process to power spectra versus the noise amplitude  $\eta_{TS}$  obtained through calculating the standard deviation of the FRET time series after 10s average filtering. Also shown is the diagonal  $\eta_{OU} = \eta_{TS}$ . **c** The noise amplitude of the first ( $\eta_{TS,1}$ ) and second half ( $\eta_{TS,2}$ ) of the time series show high correlation. All noise amplitudes are as coefficient of variance.

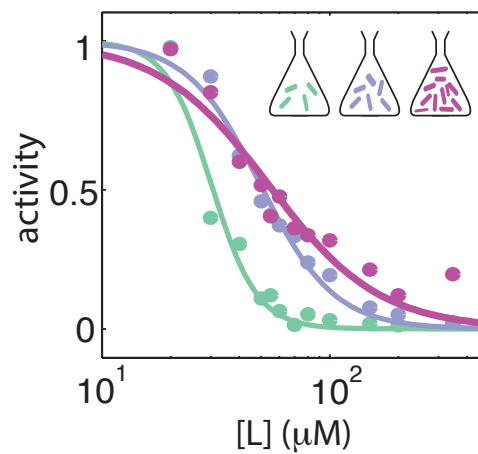

**Figure S6.** Dose response curves from population-averaged time series at harvesting OD's 0.31 (green), 0.45 (blue) and 0.59 (purple). The K/H fit value pairs are respectively 30/4.3, 50/2.7 and 53/1.8.

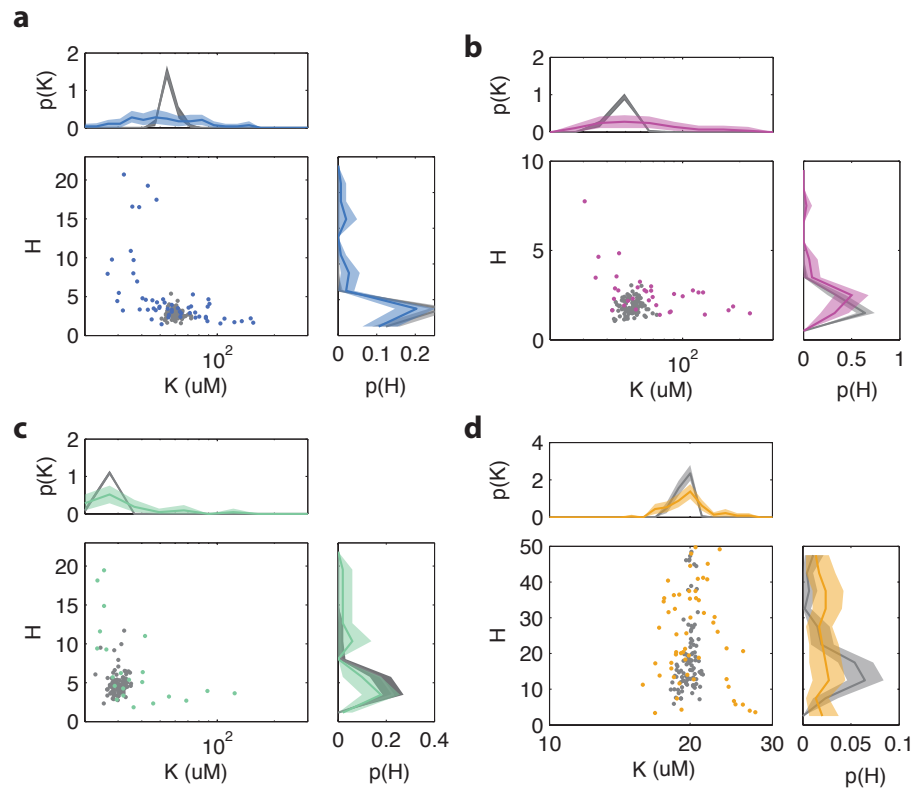

**Figure S7.** Distributions of fit parameters  $K$  and  $H$  from Hill curve fits to single-cell dose-response experiment. Colored points and lines indicate fits to measurement data, gray lines and points are from a simulation in which gaussian white noise is added to a dose response curve with  $K$  and  $H$  obtained from a fit to the population averaged time series. The noise level of the simulation is chosen such to approximate the average mean-squared error [MSE] of the dose response curve fits. Experimental data with a MSE exceeding a determined threshold are removed from the analysis. For the experiment on cells with WT receptor complement (TSS58) a maximum mse of 0.05 is used, excluding 5 cells for **(b)** for the experiment at OD=0.45, this excludes 5 cells, at **(d)** OD=0.31, 3 cells and at **(c)** OD=0.59, 6 cells. **(d)** For the experiment on Tsr-WT (UU2567) 11 cells are removed by the same criterion. All shaded areas indicate 95 % confidence intervals obtained through bootstrapping.



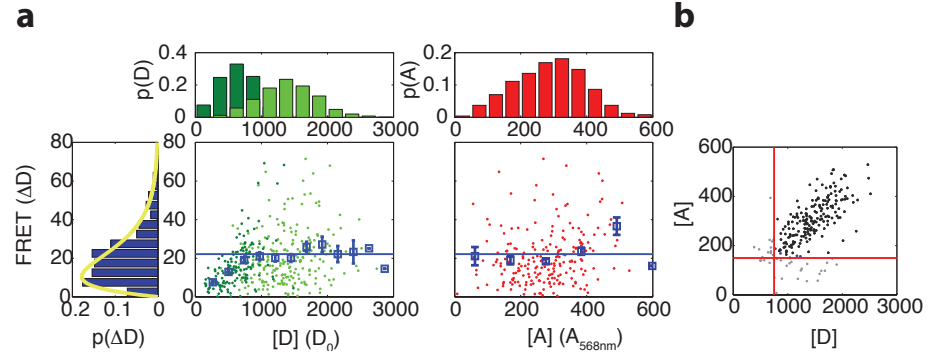

**Figure S8.** Relation between maximum FRET response and CheY / CheZ expression levels. **a**) (Left) Scatter plot with donor intensity ( $D_0$ , green) versus FRET response ( $\Delta D$ ) and (right) acceptor intensity ( $A$ , red, measured by direct excitation) with marginal distributions for  $A$ ,  $D$  and  $\Delta D$  in VS104/pSjAB12. For the donor intensity we measured at low induction (10  $\mu$ M IPTG, dark green) and high induction (100  $\mu$ M IPTG, light green). The acceptor intensities were only measured at high induction. In the scatter plots the mean FRET response is plotted with the error bars (blue), the horizontal line indicating the average for the binned data as described in panel B. The distribution of the FRET response (extreme left) is only for the gated data. The yellow curve is a fit to a gamma distribution with corresponding values and 95% confidence intervals of  $k = 2.0 \pm 0.4$  and  $\theta = 10.2 \pm 2.5$ . All fluorescent intensities are measured in photons/pixel. All histograms are normalized to the number of cells. **b**) Gating of the data. Scatter plot of donor intensity versus acceptor intensity. All data with fluorescent intensities (in photons/pixel) lower than  $D=750$  or  $A=175$  are excluded from the analysis since the FRET response may be limited by the expression of either CheZ or CheY.

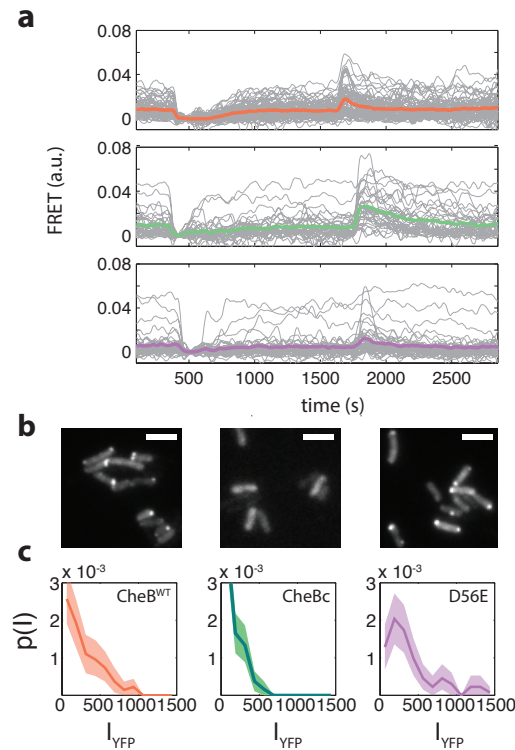

**Figure S9.** **a** Example time FRET time series for cells expressing CheB<sup>WT</sup> (top, pink), CheB<sup>D56E</sup> (blue, right), CheB<sub>c</sub> (green, right) in  $\Delta$ CheB (VS124) background. **b** Spatial organisation of CheB in the cell probed by mVenus fusions to CheB. Clustering was quantified by the fraction of cells clearly showing one or more clusters in the cell. Shown are representative examples of CheB<sup>WT</sup> (left, 78% clustered), CheB<sub>c</sub> (middle, 0%), CheB<sup>D56E</sup> (right, 72%). Scale bars 2  $\mu$ m. **c** Histograms fluorescence intensity below in units of photons/pixel. Mean and standard deviation of these distributions for the strains is (from left to right)  $272 \pm 237$  (114 cells),  $148 \pm 133$  (150 cells) and  $398 \pm 328$  (106 cells). This corresponds to std/mean 0.87, 0.90, 0.82 for the different CheB genotypes.

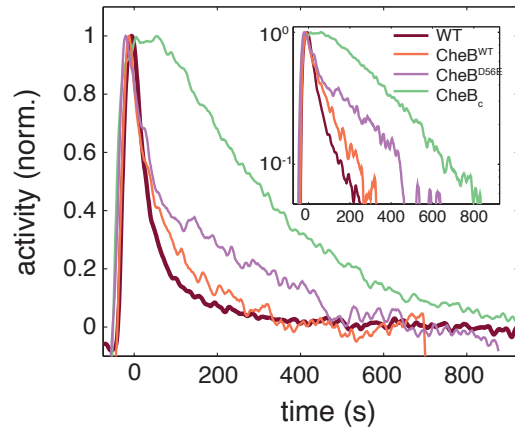

**Figure S10.** Phosphorylation feedback is not a necessary condition for highly non-linear adaptation dynamics. Population FRET time series of cells expressing CheB<sup>WT</sup> (orange), CheB<sup>D56E</sup> (purple), CheB<sub>c</sub> (green) in  $\Delta$ CheB (VS124) background as well as WT (CheB from native chromosome position, VS104, brown) are shown after removal of 500  $\mu$ M to which cells have adapted. The strain expressing CheB<sup>D56E</sup> lacks phosphorylation feedback but has a fast, non-linear removal response. The population FRET experiment is performed as described previously (Sourjik and Berg, 2002b). The strains and induction levels are the same as in the single-cell FRET experiments on the CheB mutants.

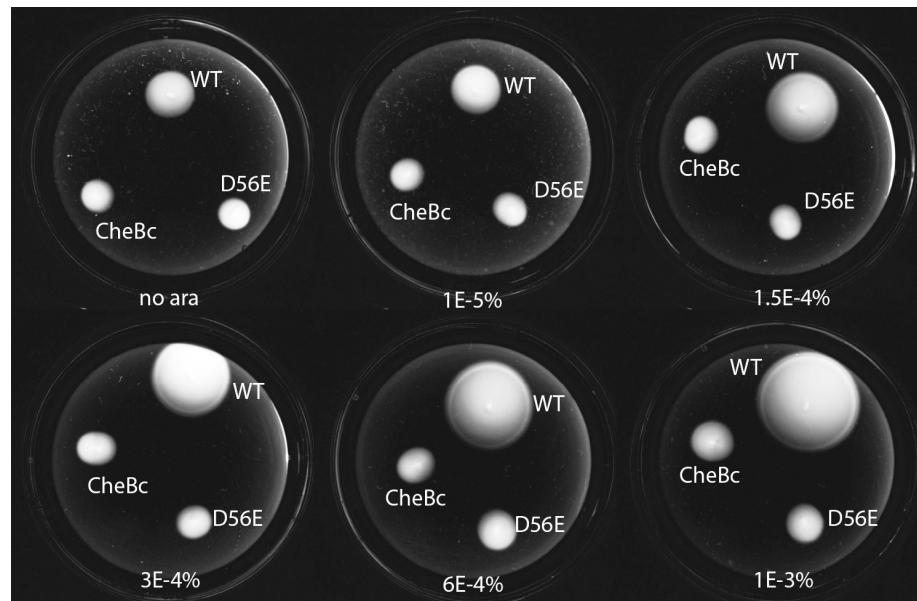

**Figure S11.** Dark-field images after 14 h of growth and motility on soft agar plates (0.26 % agar in TB with appropriate antibiotics, kept at 33.5 ° C). The different strains express either WT CheB, CheB-D56E and CheBc from an arabinose inducible pBAD plasmid in  $\Delta$  CheB strain (UU2614). The arabinose concentration is varied from 0 % to 0.001 %
